# Supplementary material
Source: publisher figshare collection journal article supplement (https://acs.figshare.com/ndownloader/files/21728517)
Supplement: Supplementary file 1 [file 21728517]

## **Carbocatalytic acetylene cyclotrimerization: a key role of unpaired electron delocalization**

*Evgeniy G. Gordeev, Evgeniy O. Pentsak, Valentine P. Ananikov\**

Zelinsky Institute of Organic Chemistry, Russian Academy of Sciences,  
Leninsky prospekt 47, Moscow, 119991, Russia  
*val@ioc.ac.ru.*

### **Content:**

|                                                                                                                                                  |     |
|--------------------------------------------------------------------------------------------------------------------------------------------------|-----|
| 1. Molecular structures of model carbocatalysts.....                                                                                             | S2  |
| 2. Acetylene trimerization with C <sub>37</sub> H <sub>14</sub> carbene as a carbocatalyst.....                                                  | S4  |
| 3. Acetylene trimerization with C <sub>14</sub> H <sub>10</sub> carbene as a carbocatalyst.....                                                  | S10 |
| 4. Acetylene trimerization with C <sub>37</sub> H <sub>15</sub> and C <sub>19</sub> H <sub>11</sub> (olympiceny) monoradical carbocatalysts..... | S17 |
| 5. Acetylene trimerization with non-Kekulé C <sub>25</sub> H <sub>12</sub> carbocatalyst .....                                                   | S20 |
| 6. Acetylene trimerization with phenyl monoradical as a carbocatalyst .....                                                                      | S23 |
| 7. Evaluation of the theoretical calculations accuracy for different basis sets and theory levels .....                                          | S27 |
| 8. Evaluation of graphene systems of different sizes.....                                                                                        | S29 |
| 9. Experimental benzene synthesis .....                                                                                                          | S32 |

## 1. Molecular structures of model carbocatalysts

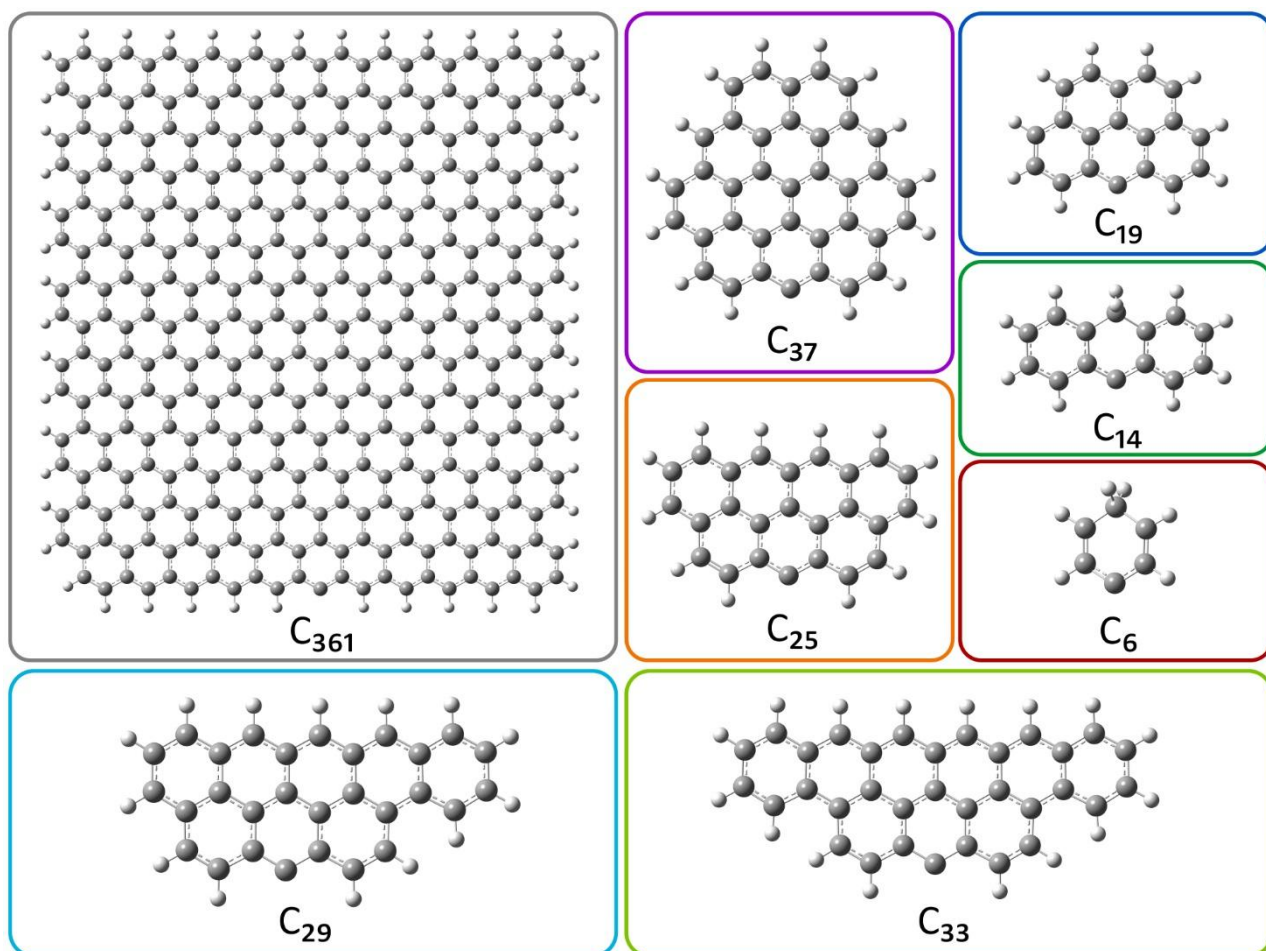

**Figure S1.** Molecular structures of model carbocatalysts used in the study: C<sub>361</sub>, C<sub>37</sub>, C<sub>33</sub>, C<sub>29</sub>, C<sub>25</sub>, C<sub>19</sub>, C<sub>14</sub> and C<sub>6</sub>.

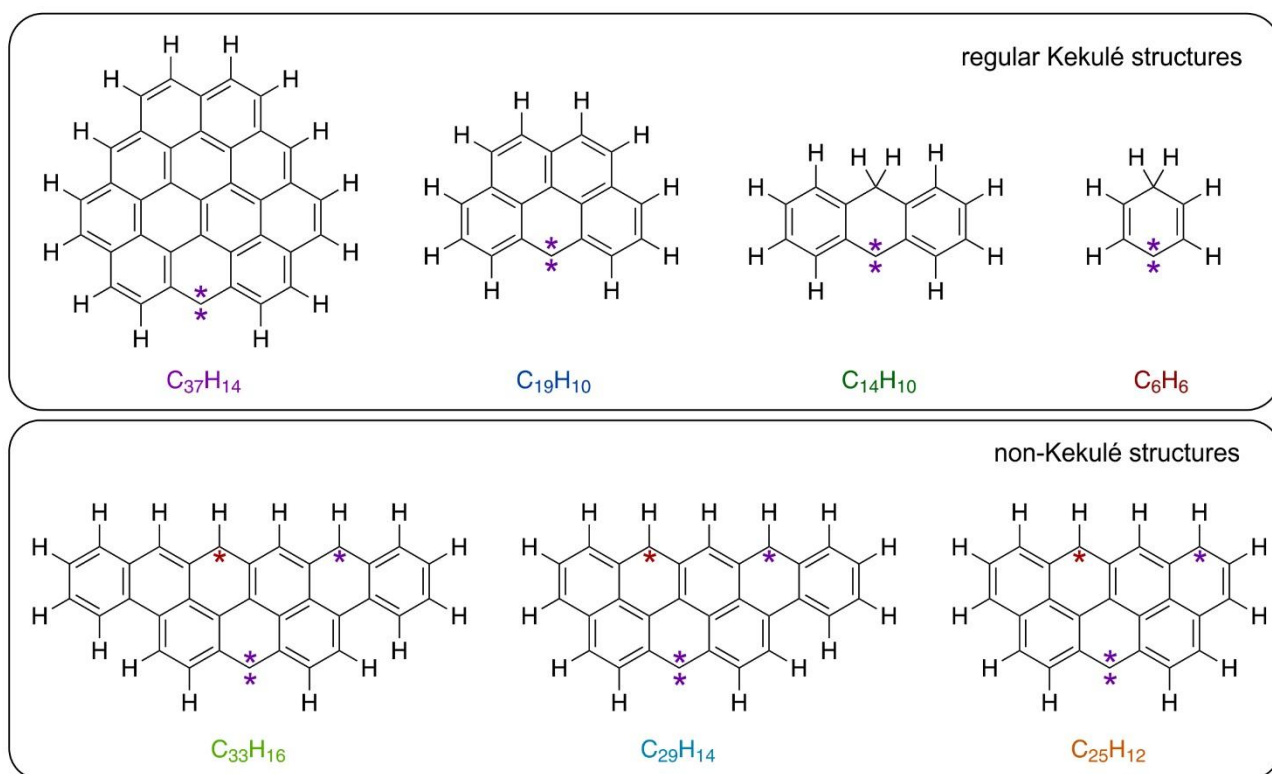

**Figure S2.** Regular Kekulé structures ( $C_{37}H_{14}$ ,  $C_{19}H_{10}$ ,  $C_{14}H_{10}$ ,  $C_6H_6$ ) and non-Kekulé structures ( $C_{33}H_{16}$ ,  $C_{29}H_{14}$ ,  $C_{25}H_{12}$  with one of the possible allocations of unpaired electrons) of graphene flakes. Unpaired electrons are denoted by asterisks.

## 2. Acetylene trimerization with $C_{37}H_{14}$ carbene as a carbocatalyst

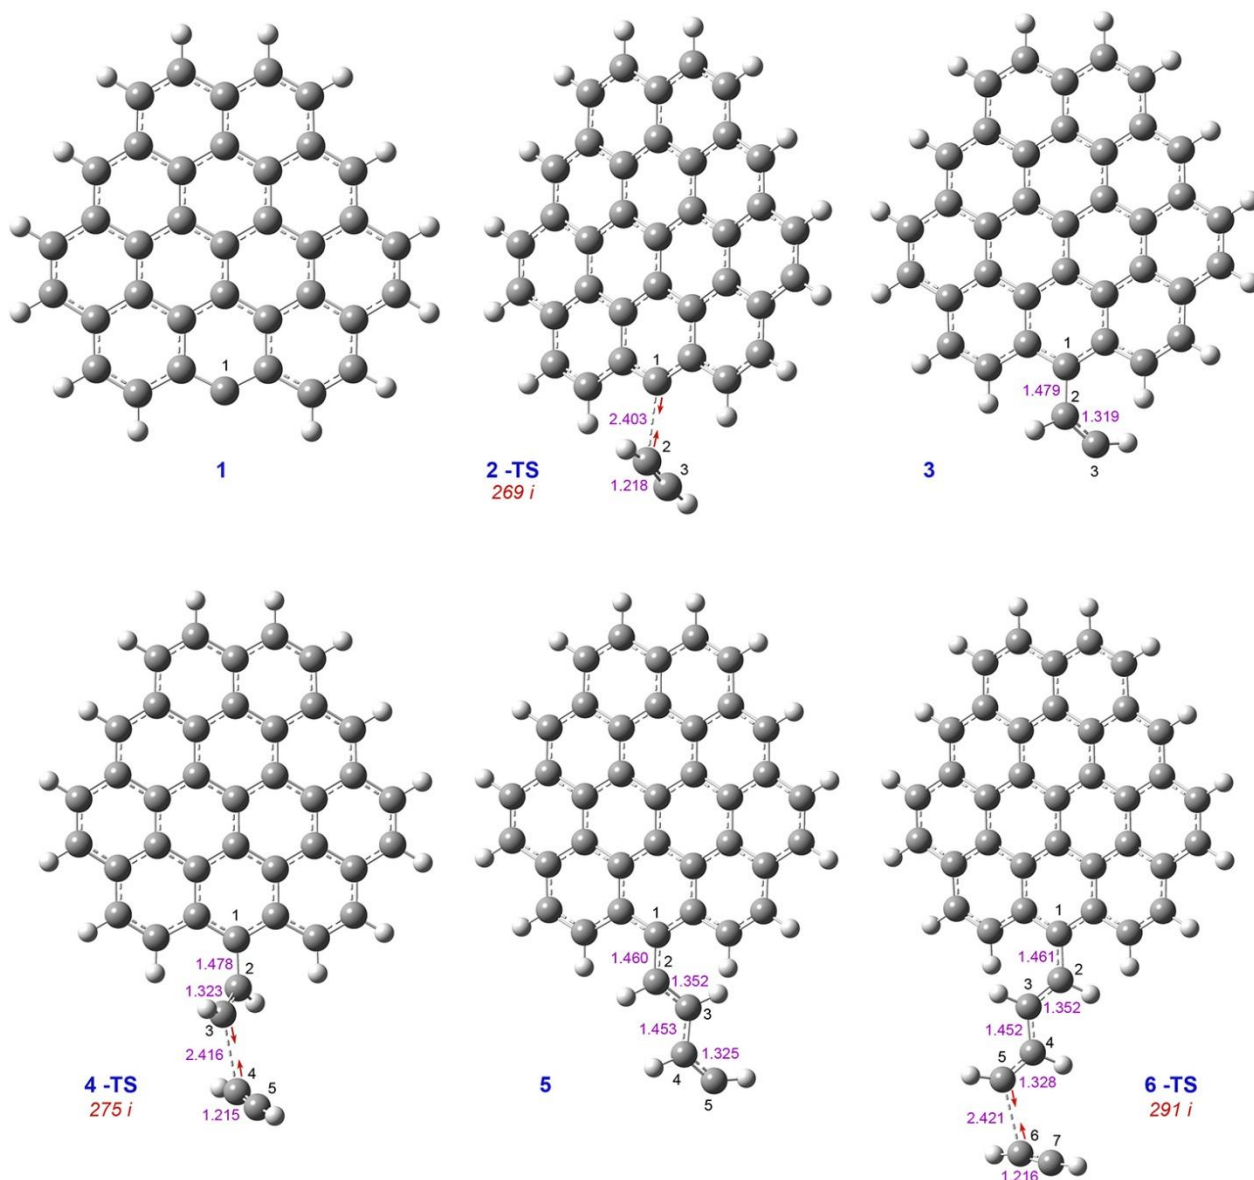

**Figure S3.** Optimized molecular structures of the stationary points **1** to **6-TS** for the polycyclic triplet carbene-catalyzed reaction. The interatomic distances are displayed in angstroms. For each transition state, the imaginary frequency is shown; directions of atomic movements corresponding to imaginary frequencies are shown by red arrows; UPBE1PBE/6-31G(d) level.

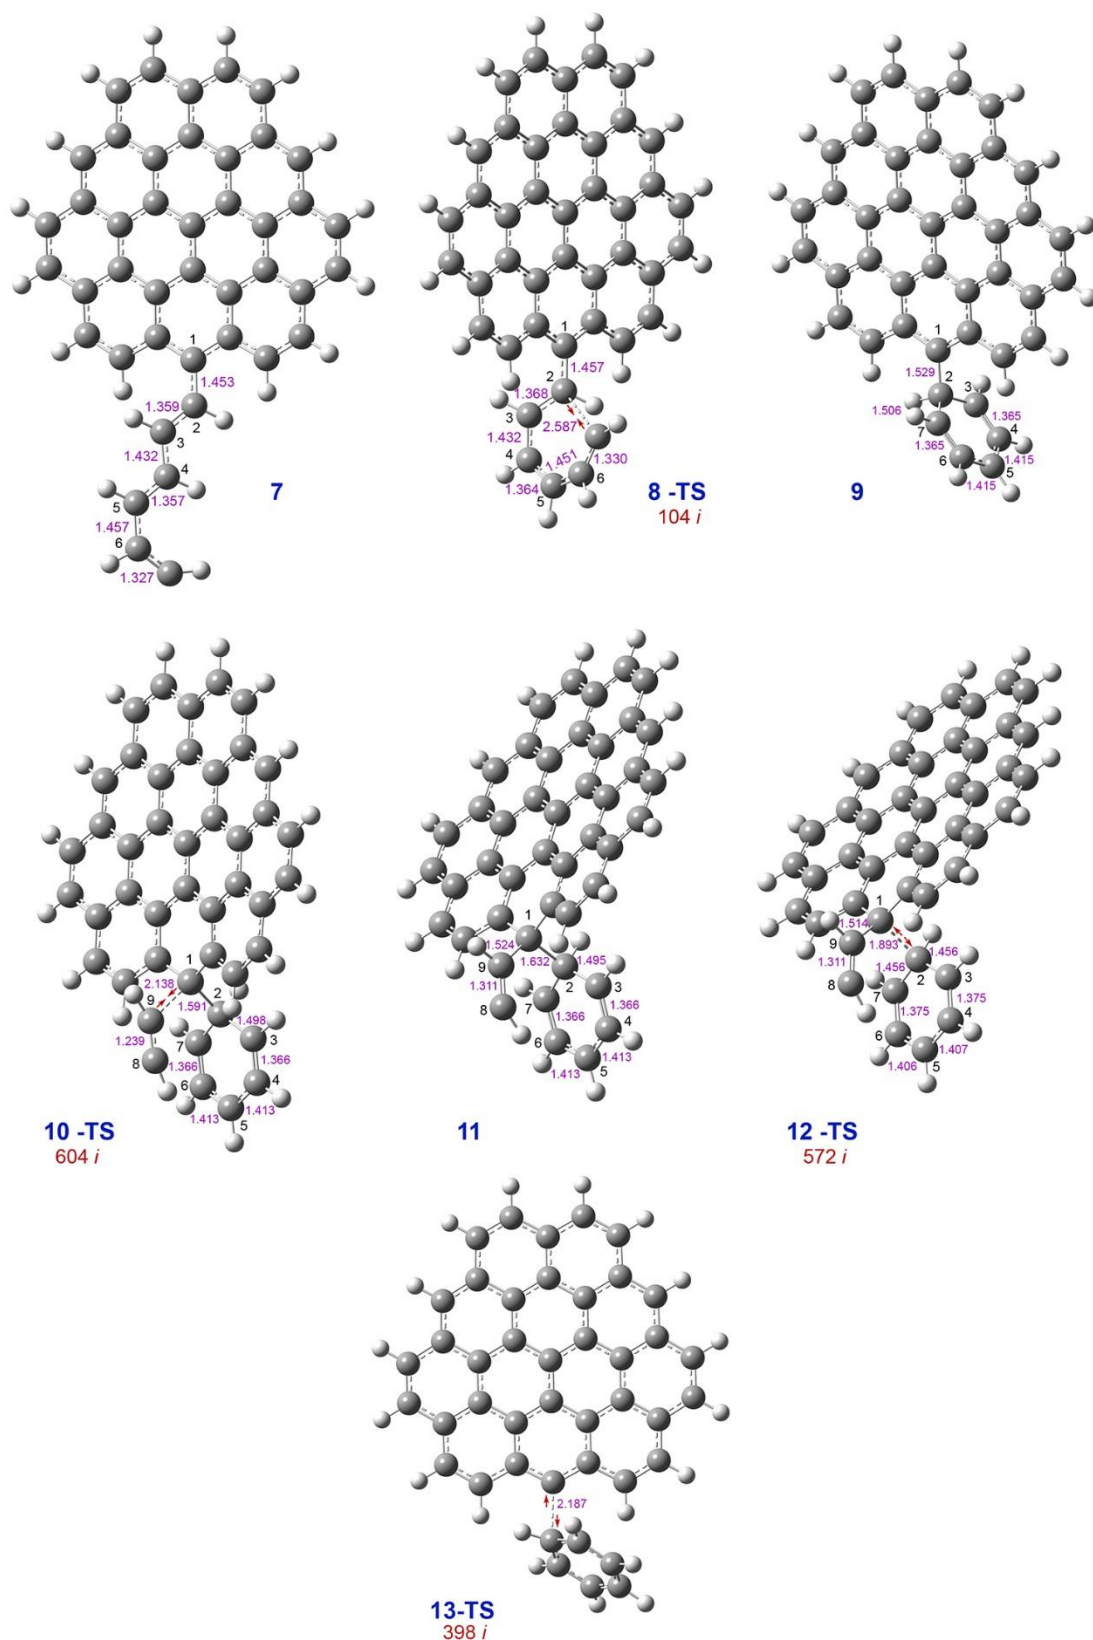

**Figure S4.** Optimized molecular structures of the stationary points **7** to **13-TS** for the polycyclic triplet carbene-catalyzed reaction. The interatomic distances are displayed in angstroms. For each transition state, the imaginary frequency is shown; directions of atomic movements corresponding to imaginary frequencies are shown by red arrows; UPBE1PBE/6-31G(d) level.

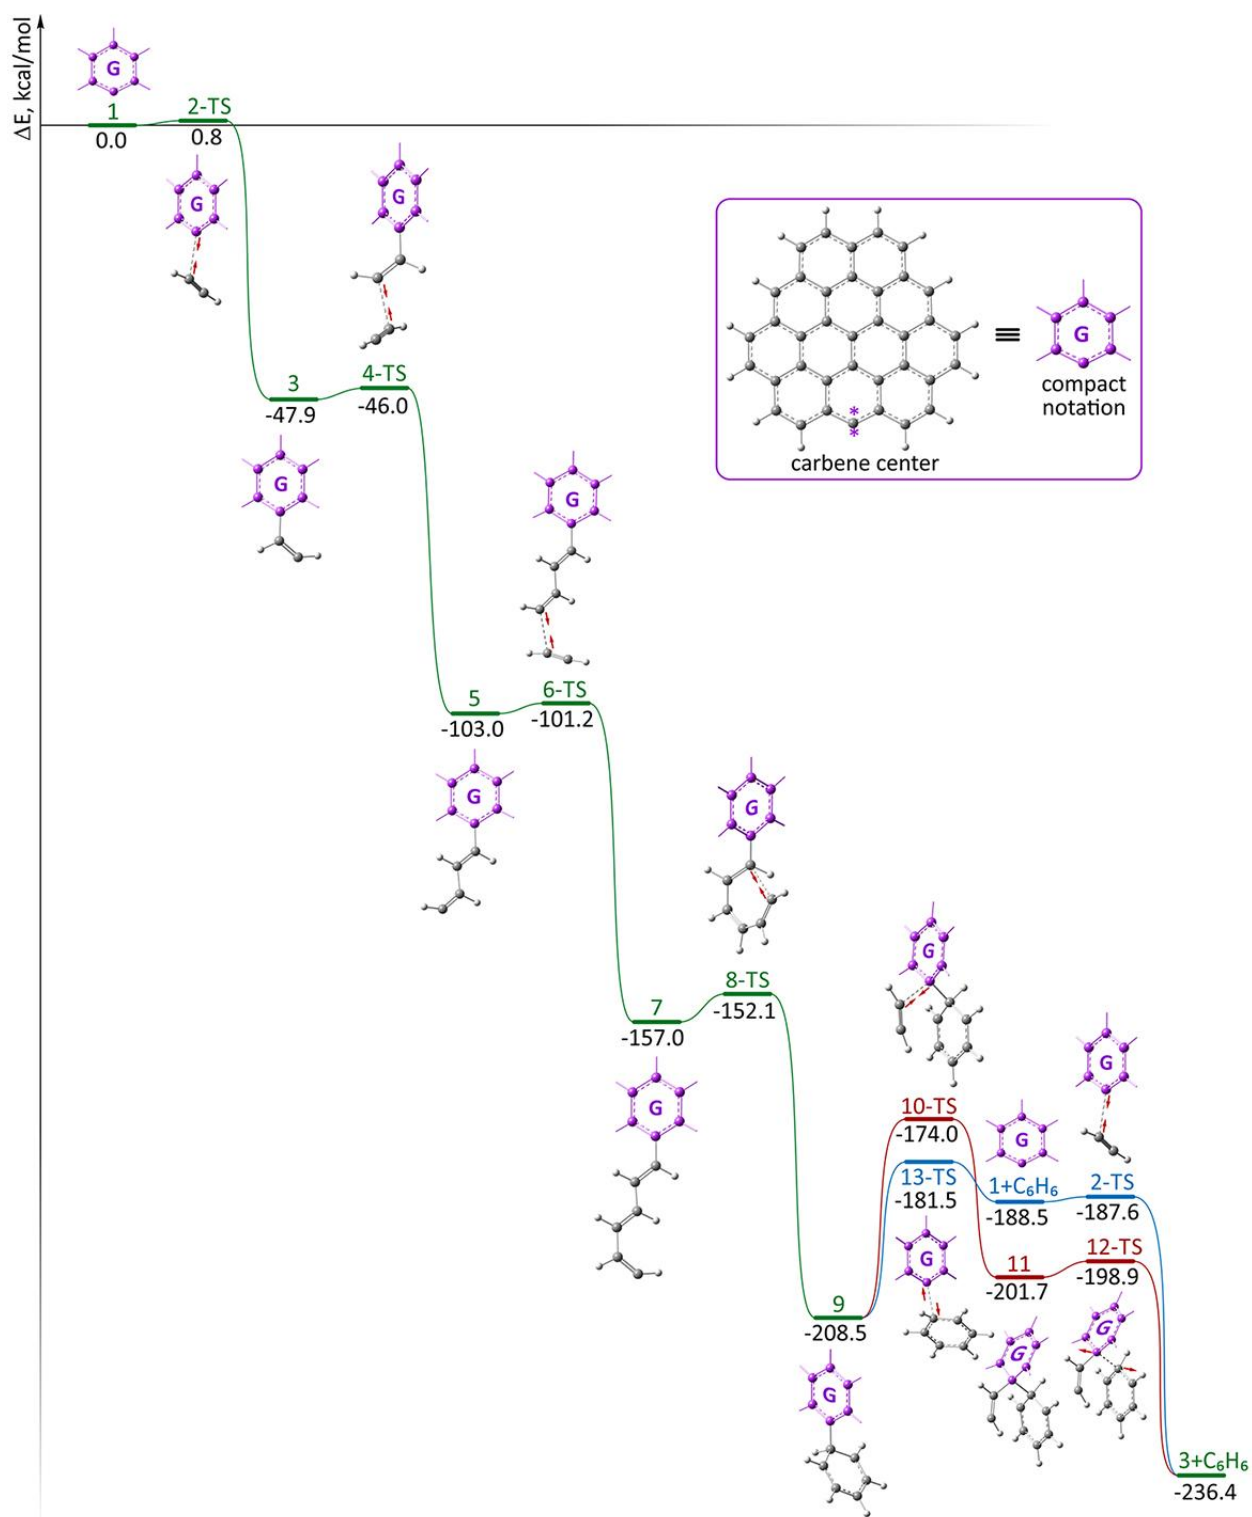

**Figure S5.** Total energy profile of acetylene cyclotrimerization reaction ( $\Delta E$ ) with  $C_{37}H_{14}$  carbene as a catalyst; UPBE1PBE/6-31G(d) level.

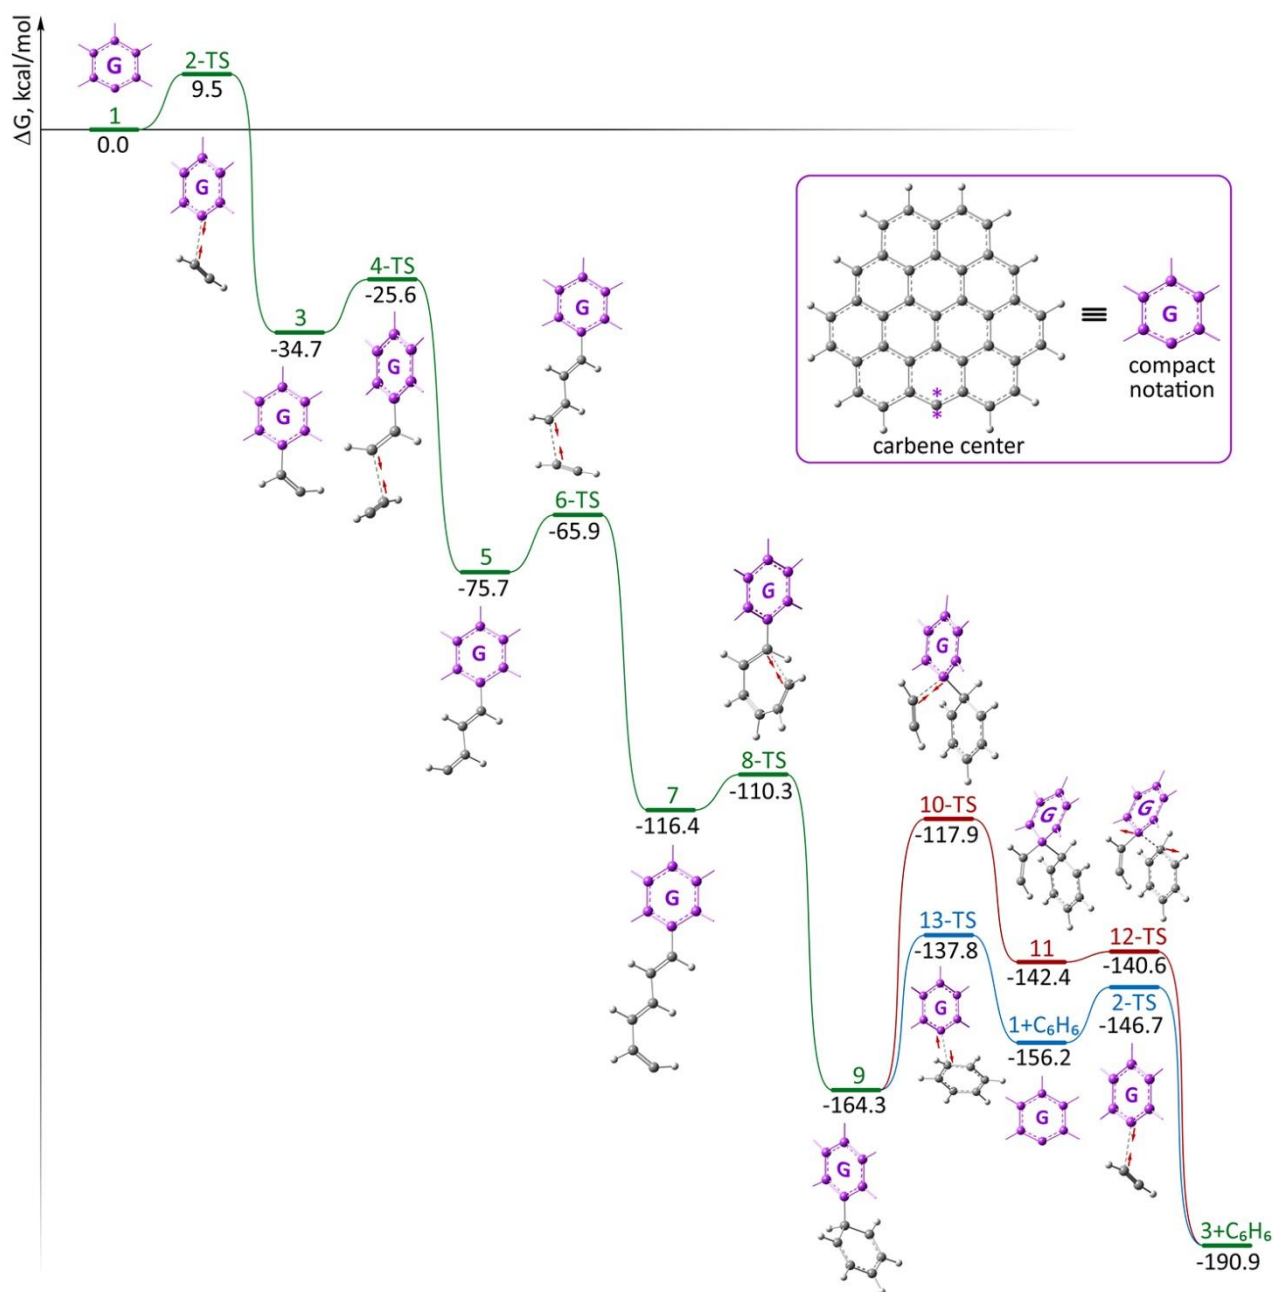

**Figure S6.** Free energy profile of acetylene cyclotrimerization reaction ( $\Delta G$ ) with  $C_{37}H_{14}$  carbene as a catalyst; UPBE1PBE/6-31G(d) level.



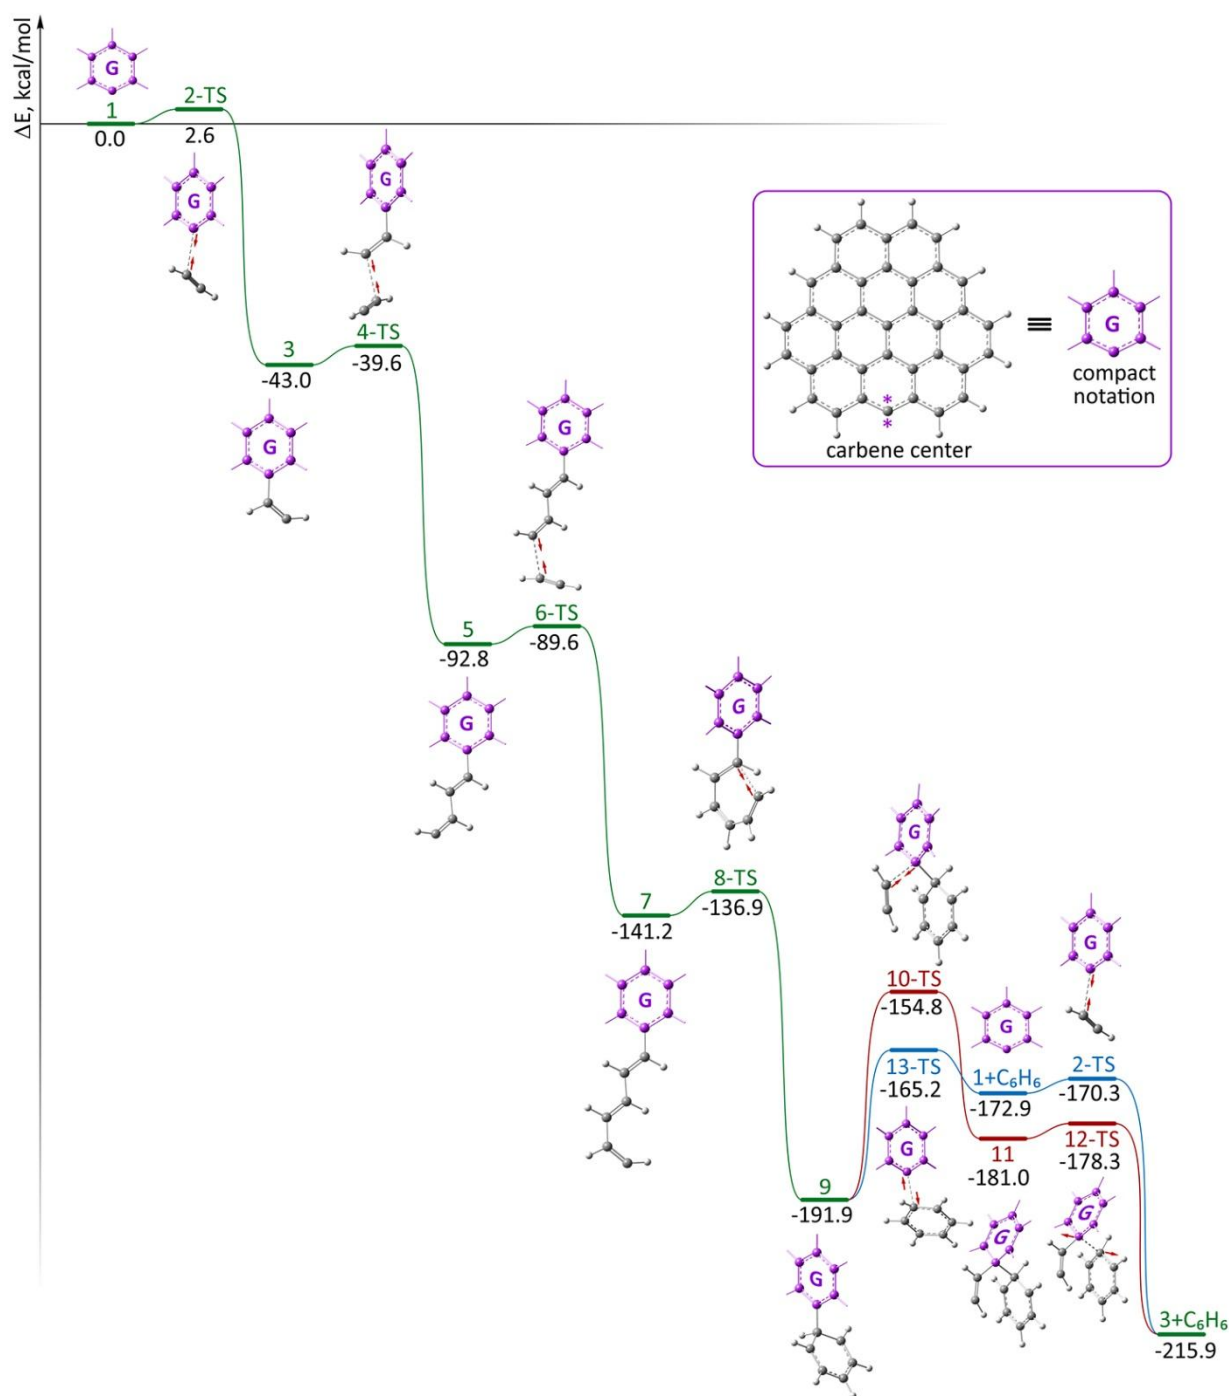

**Figure S7.** Total energy profile of acetylene cyclotrimerization reaction ( $\Delta E$ ) with  $C_{37}H_{14}$  carbene as a catalyst; single point calculations at UPBE1PBE/6-311++G(d,p) level for geometries optimized at UPBE1PBE/6-31G(d) level.



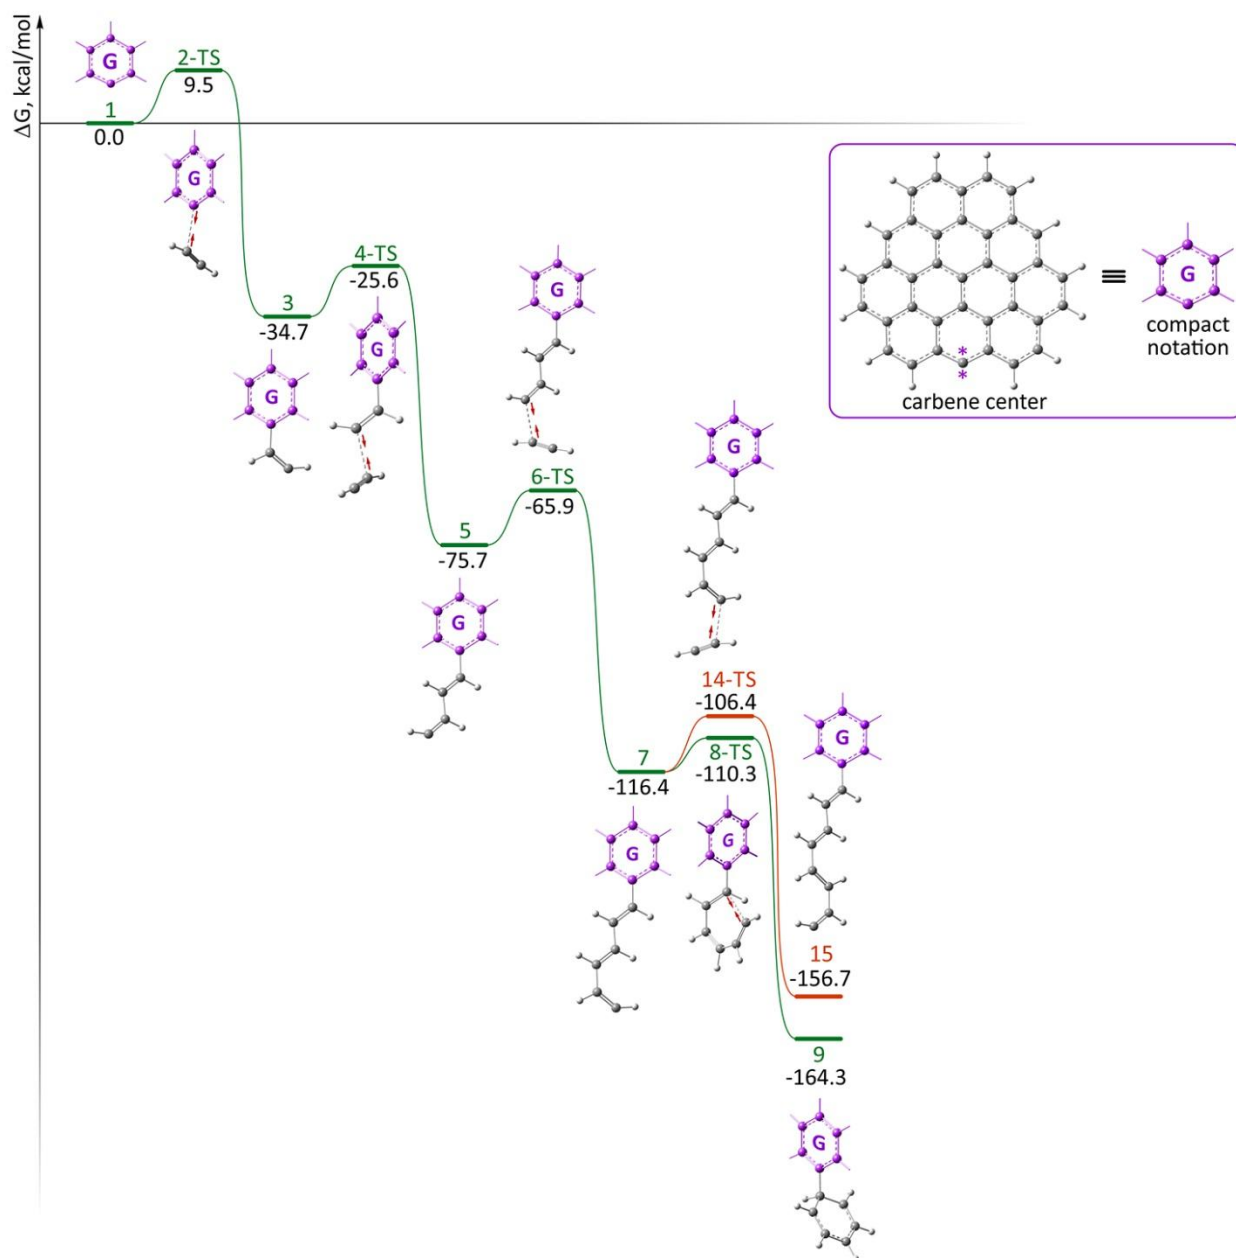

**Figure S8.** Free energy profiles of acetylene cyclotrimerization (green line) and linear tetramerization (orange line) reactions with  $C_{37}H_{14}$  carbene as a catalyst; UPBE1PBE/6-31G(d) level.

### 3. Acetylene trimerization with $C_{14}H_{10}$ carbene as a carbocatalyst

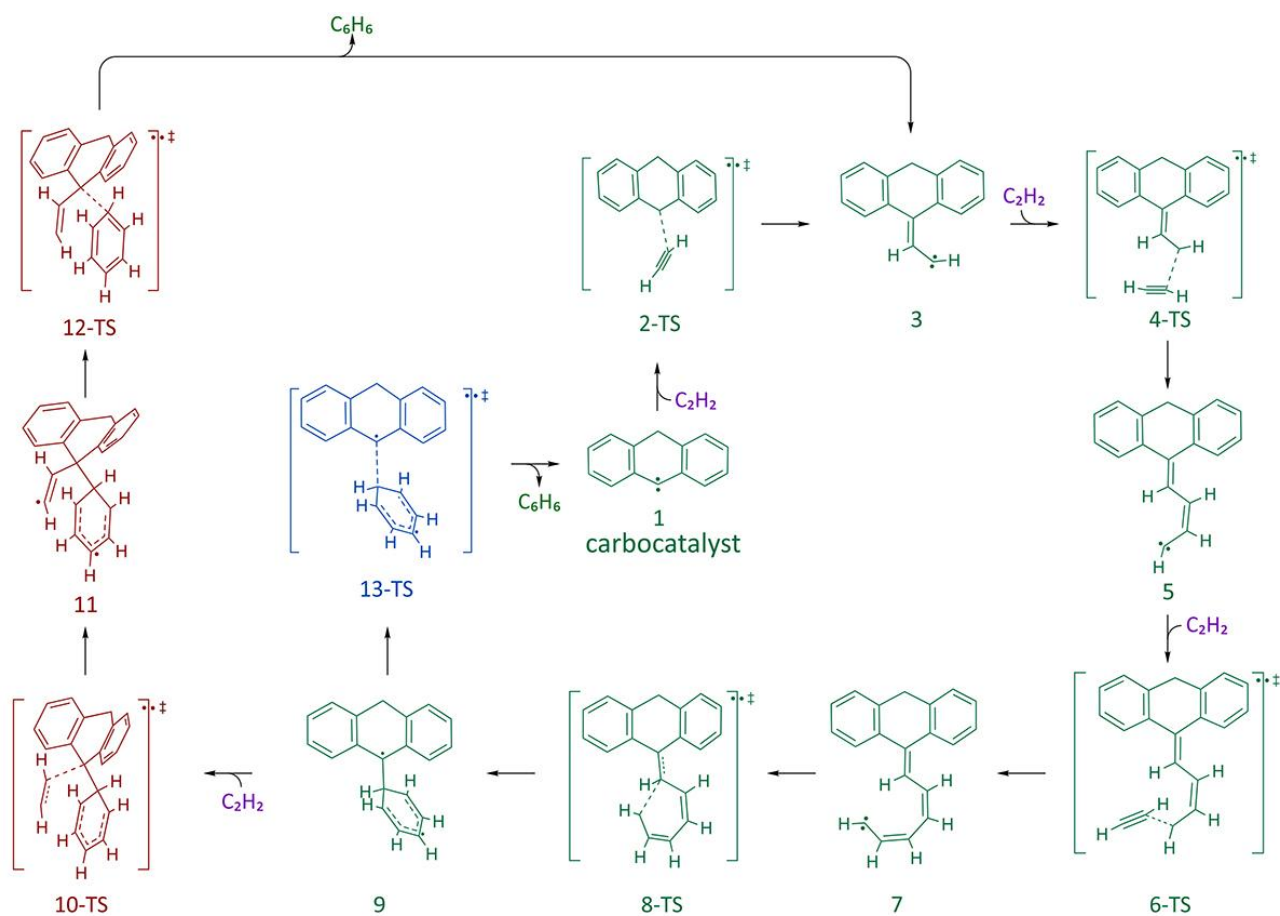

**Figure S9.** Acetylene cyclotrimerization reaction with tricyclic  $C_{14}H_{10}$  carbene as a catalyst.

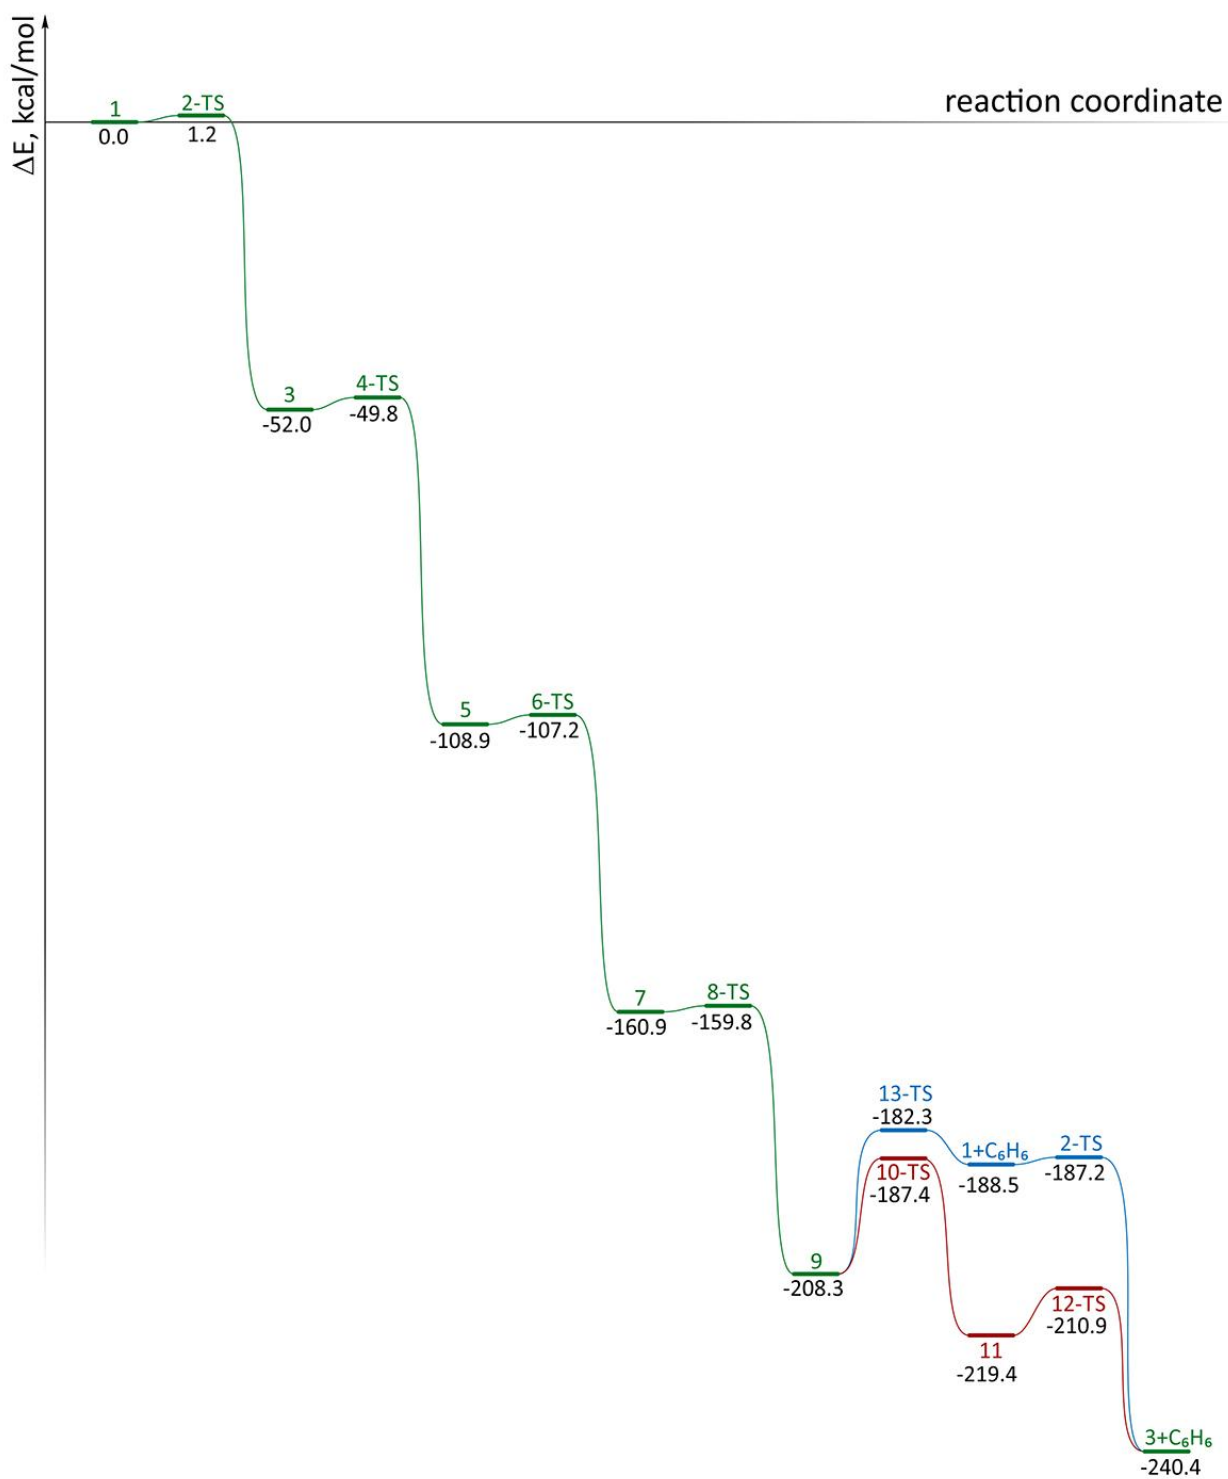

**Figure S10.** Total energy profile ( $\Delta E$ ) of acetylene cyclotrimerization reaction with C<sub>14</sub>H<sub>10</sub> tricyclic carbene as a catalyst; UPBE1PBE/6-31G(d) level.

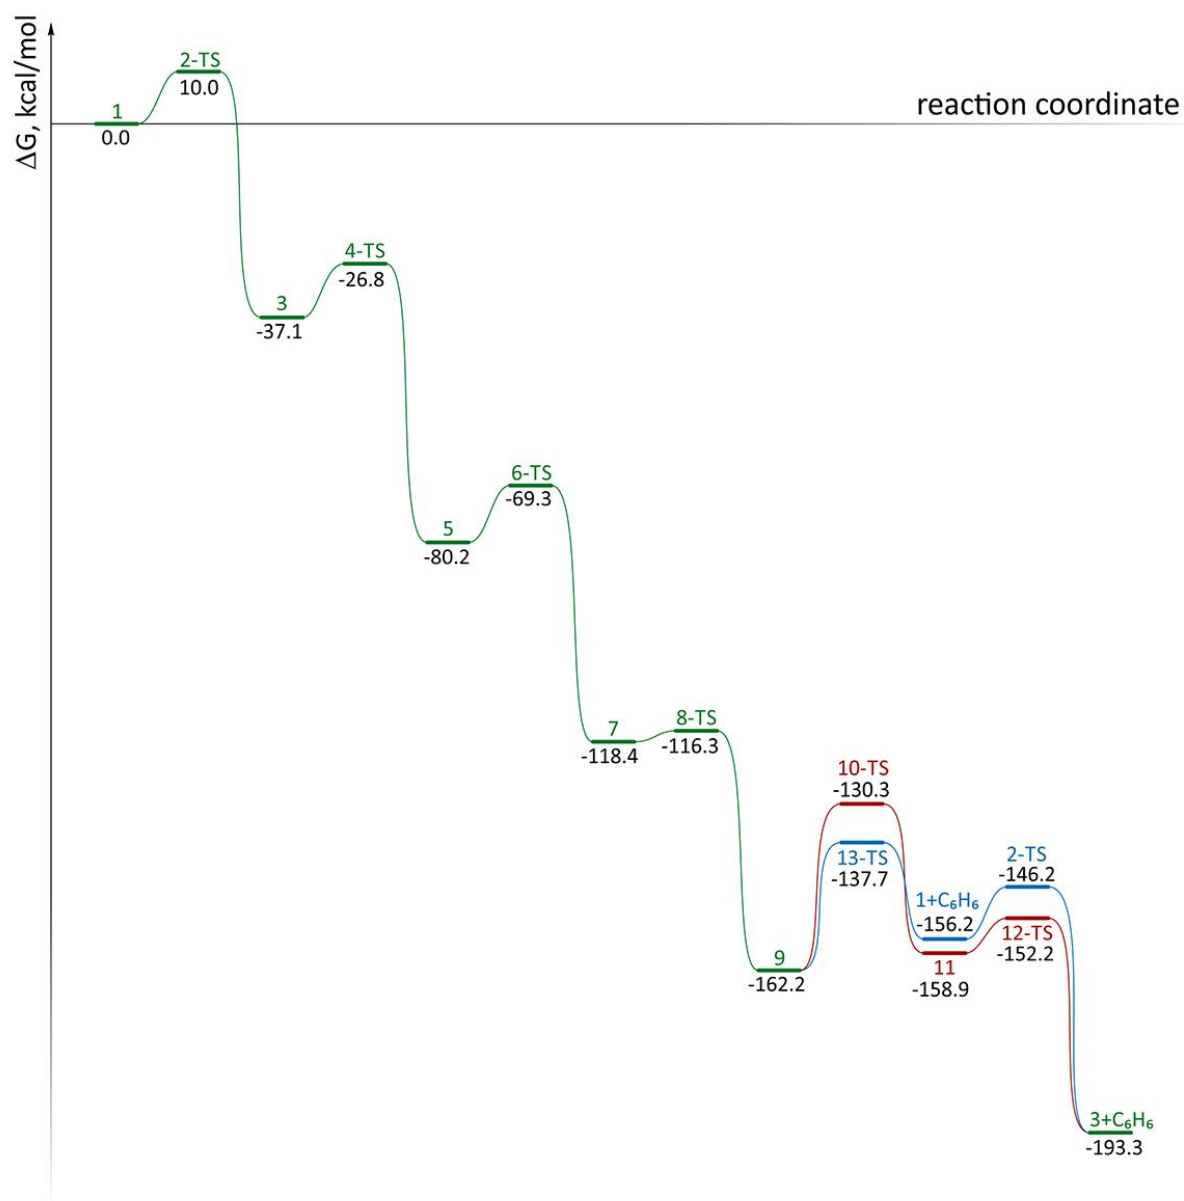

**Figure S11.** Gibbs free energy profile ( $\Delta G$ ) of acetylene cyclotrimerization reaction with  $C_{14}H_{10}$  tricyclic carbene as a catalyst; UPBE1PBE/6-31G(d) level.

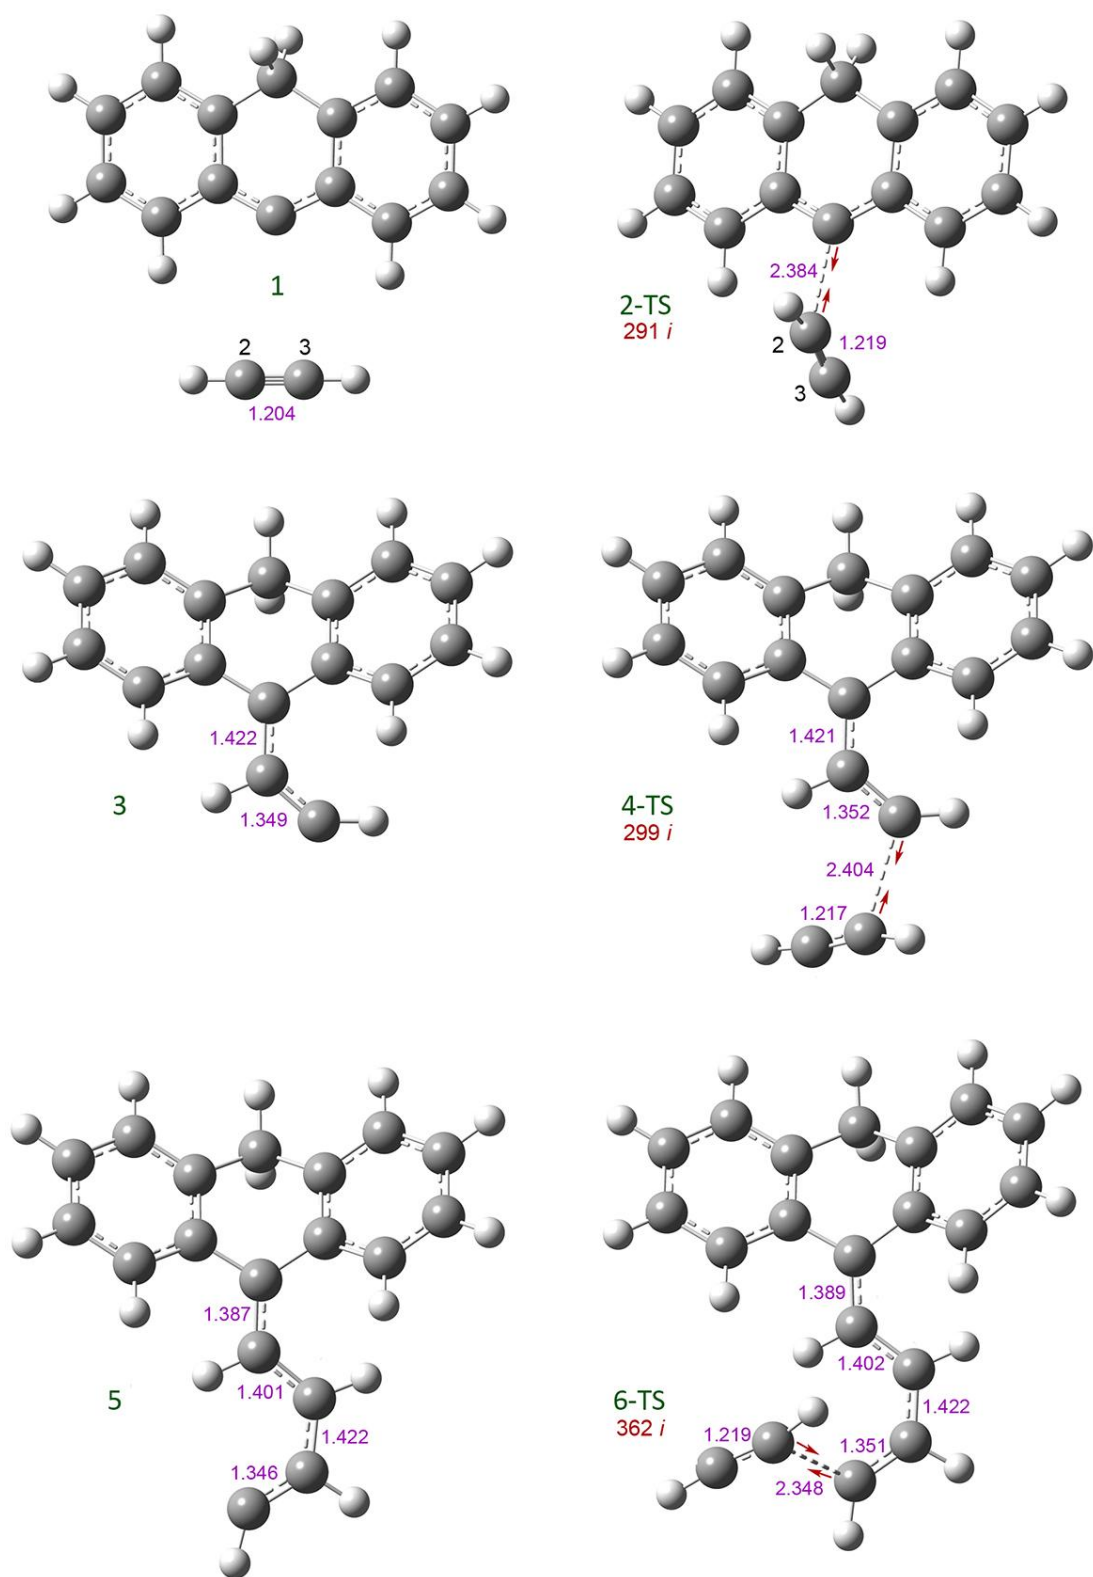

**Figure S12.** Optimized molecular structures of the stationary points **1** – **6-TS** for the tricyclic triplet carbene-catalyzed reaction. The interatomic distances are in angstroms. For each transition state, the imaginary frequency is shown; directions of atomic movements corresponding to imaginary frequencies are shown by red arrows; UPBE1PBE/6-31G(d) level.

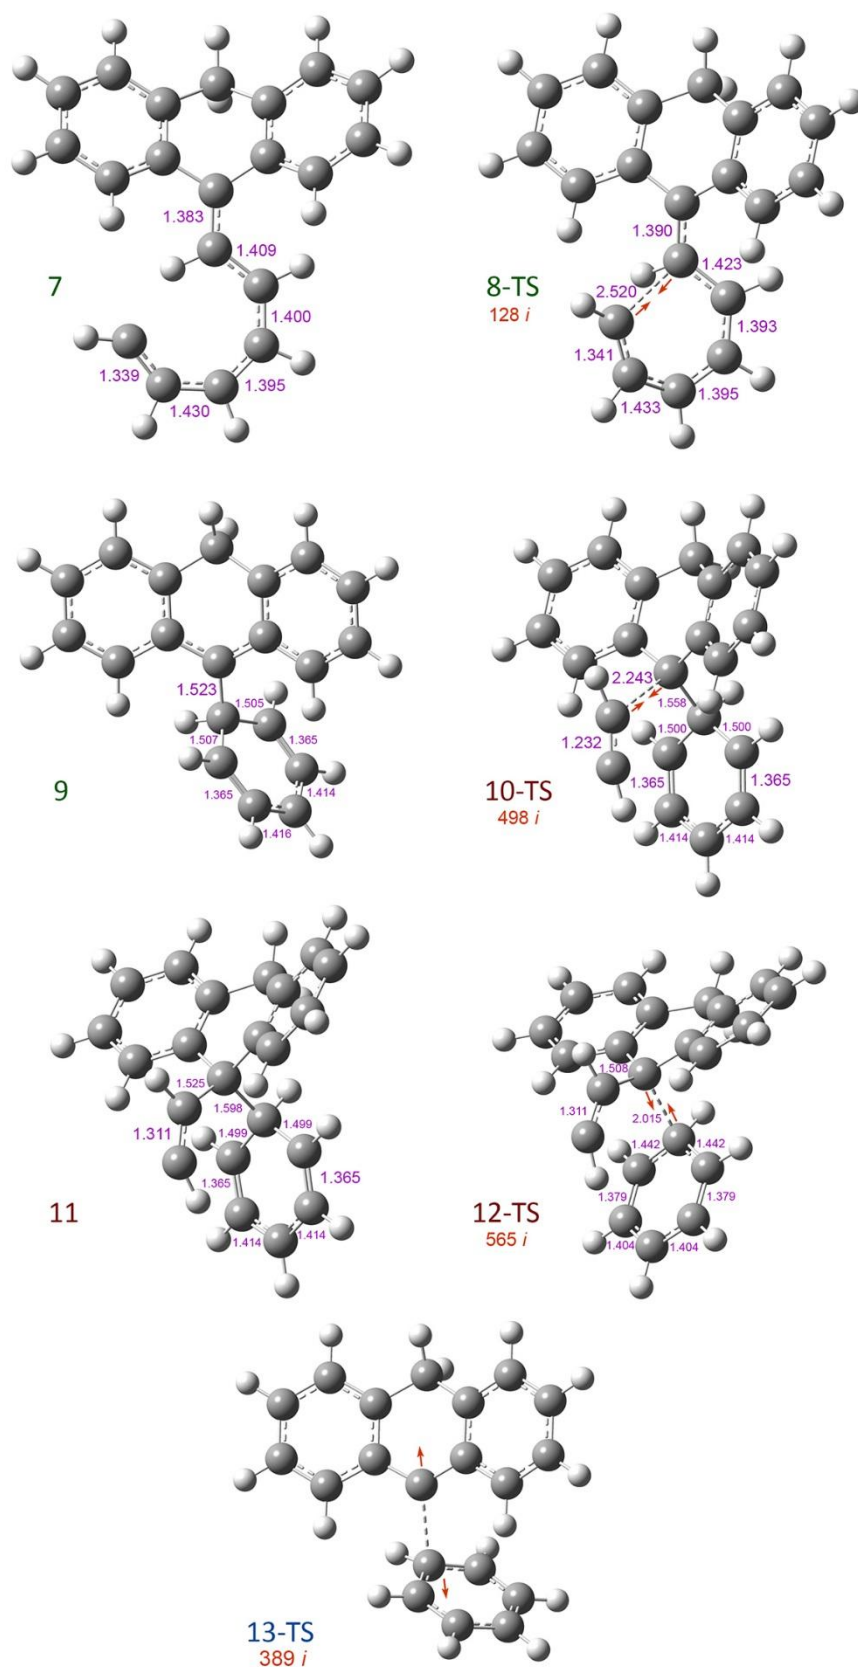

**Figure S13.** Optimized molecular structures of the stationary points **7** to **13-TS** for the tricyclic triplet carbene-catalyzed reaction. The interatomic distances are in angstroms. For each transition state, the imaginary frequency is shown; directions of atomic movements corresponding to imaginary frequencies are shown by red arrows; UPBE1PBE/6-31G(d) level.

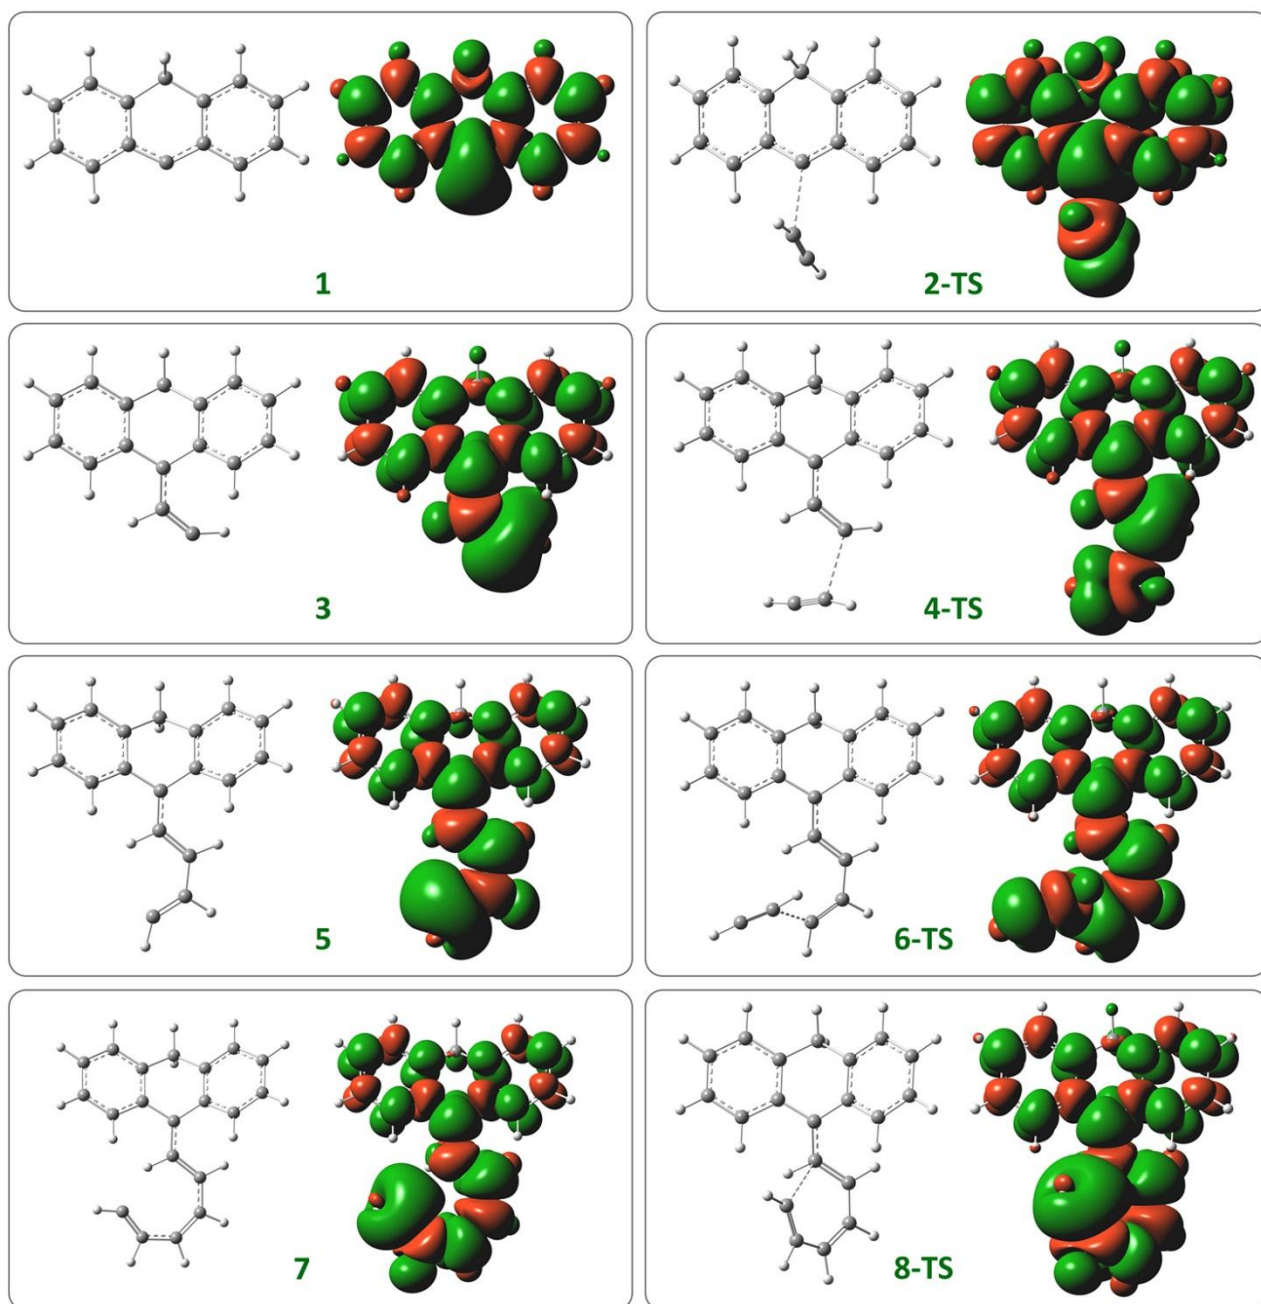

**Figure S14.** Spin density distributions in the stationary points **1** – **8-TS** for  $C_{14}H_{10}$  carbocatalyst; UPBE1PBE/6-31G(d) level.



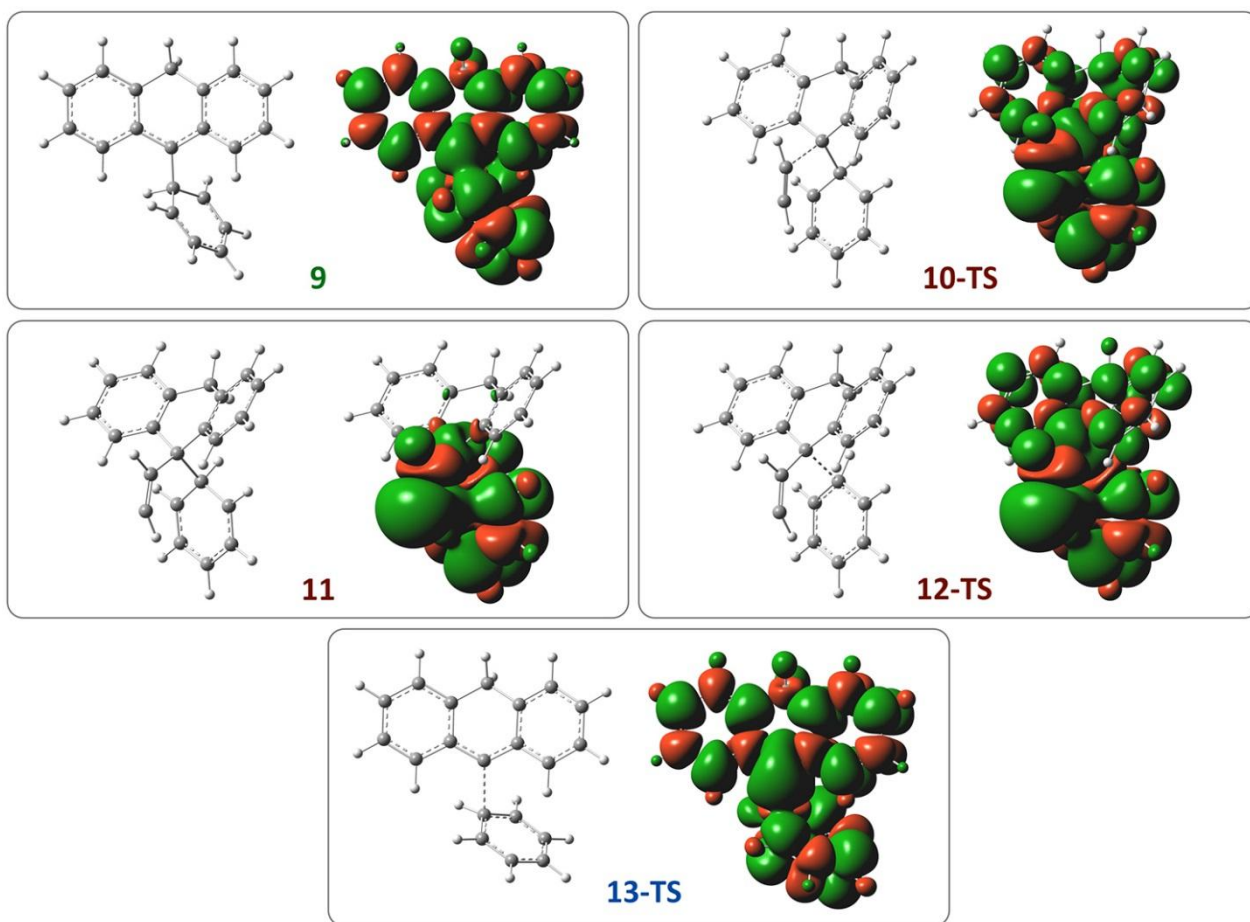

**Figure S15.** Spin density distributions in the stationary points **9** – **13-TS** for  $C_{14}H_{10}$  carbocatalyst; UPBE1PBE/6-31G(d) level.

#### 4. Acetylene trimerization with $C_{37}H_{15}$ and $C_{19}H_{11}$ (olympicenyl) monoradical carbocatalysts

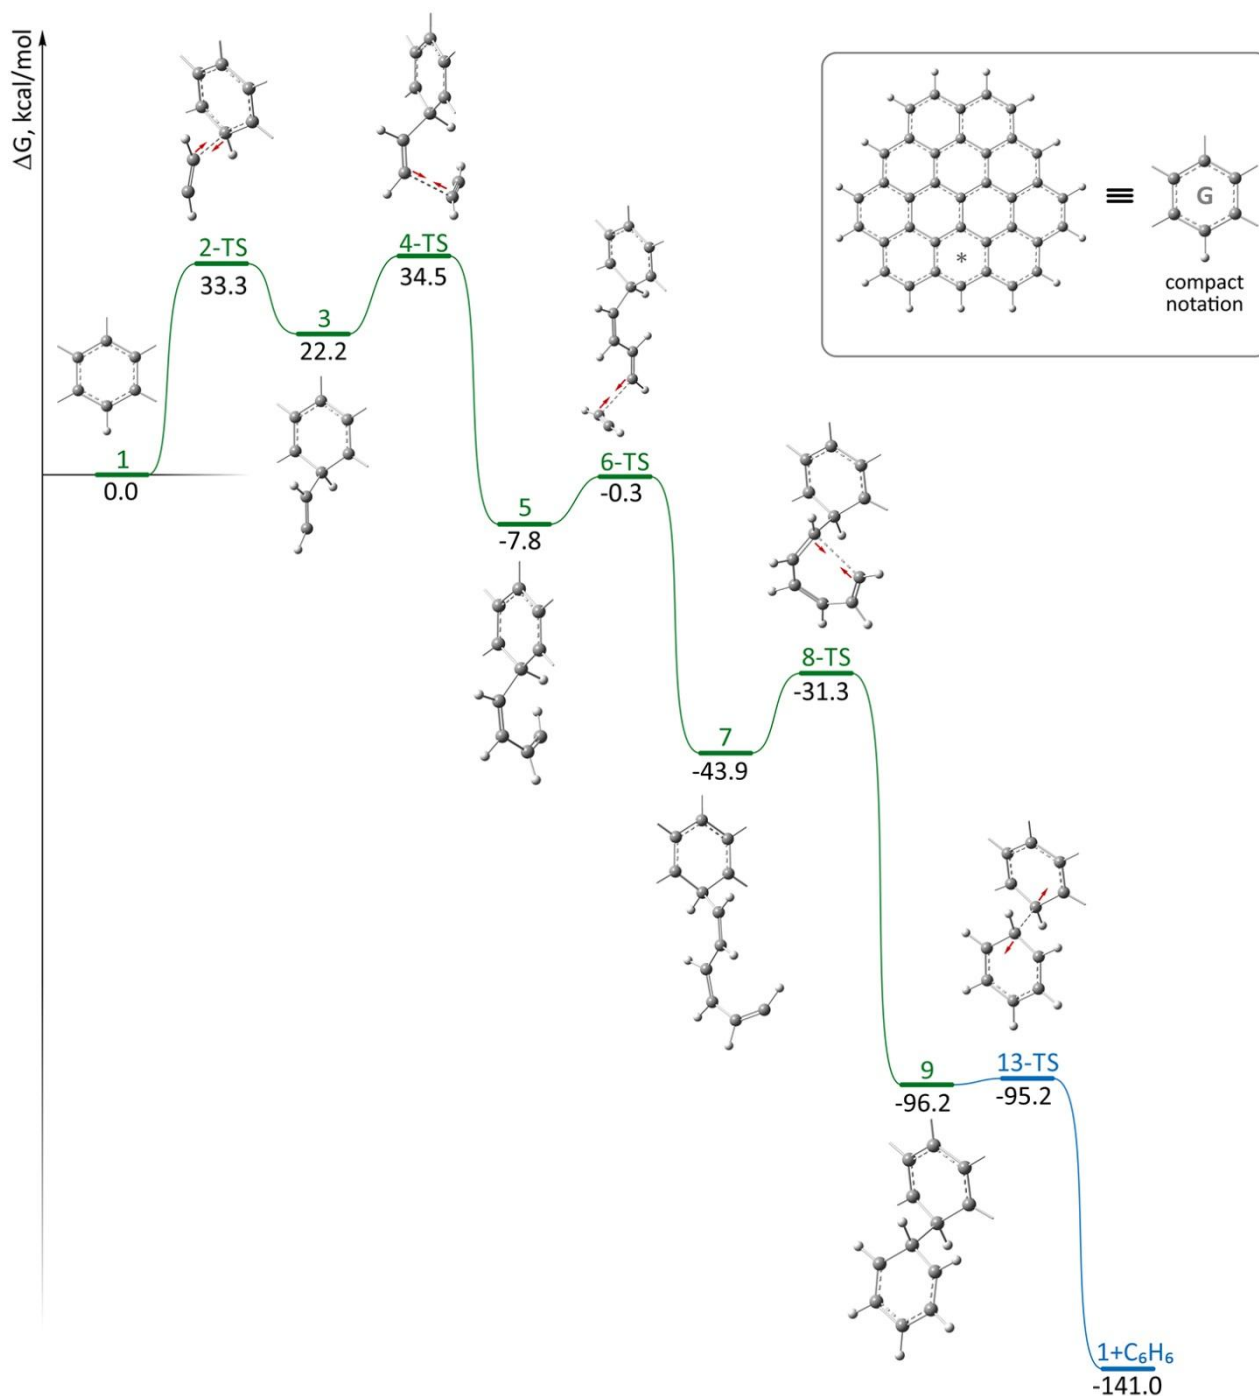

**Figure S16.** Free energy profile of acetylene cyclotrimerization reaction ( $\Delta G$ ) with  $C_{37}H_{15}$  polyaromatic hydrocarbon as a catalyst; single point calculations at UPBE1PBE/6-311++G(d,p) level for geometries optimized at UPBE1PBE/6-31G(d) level.

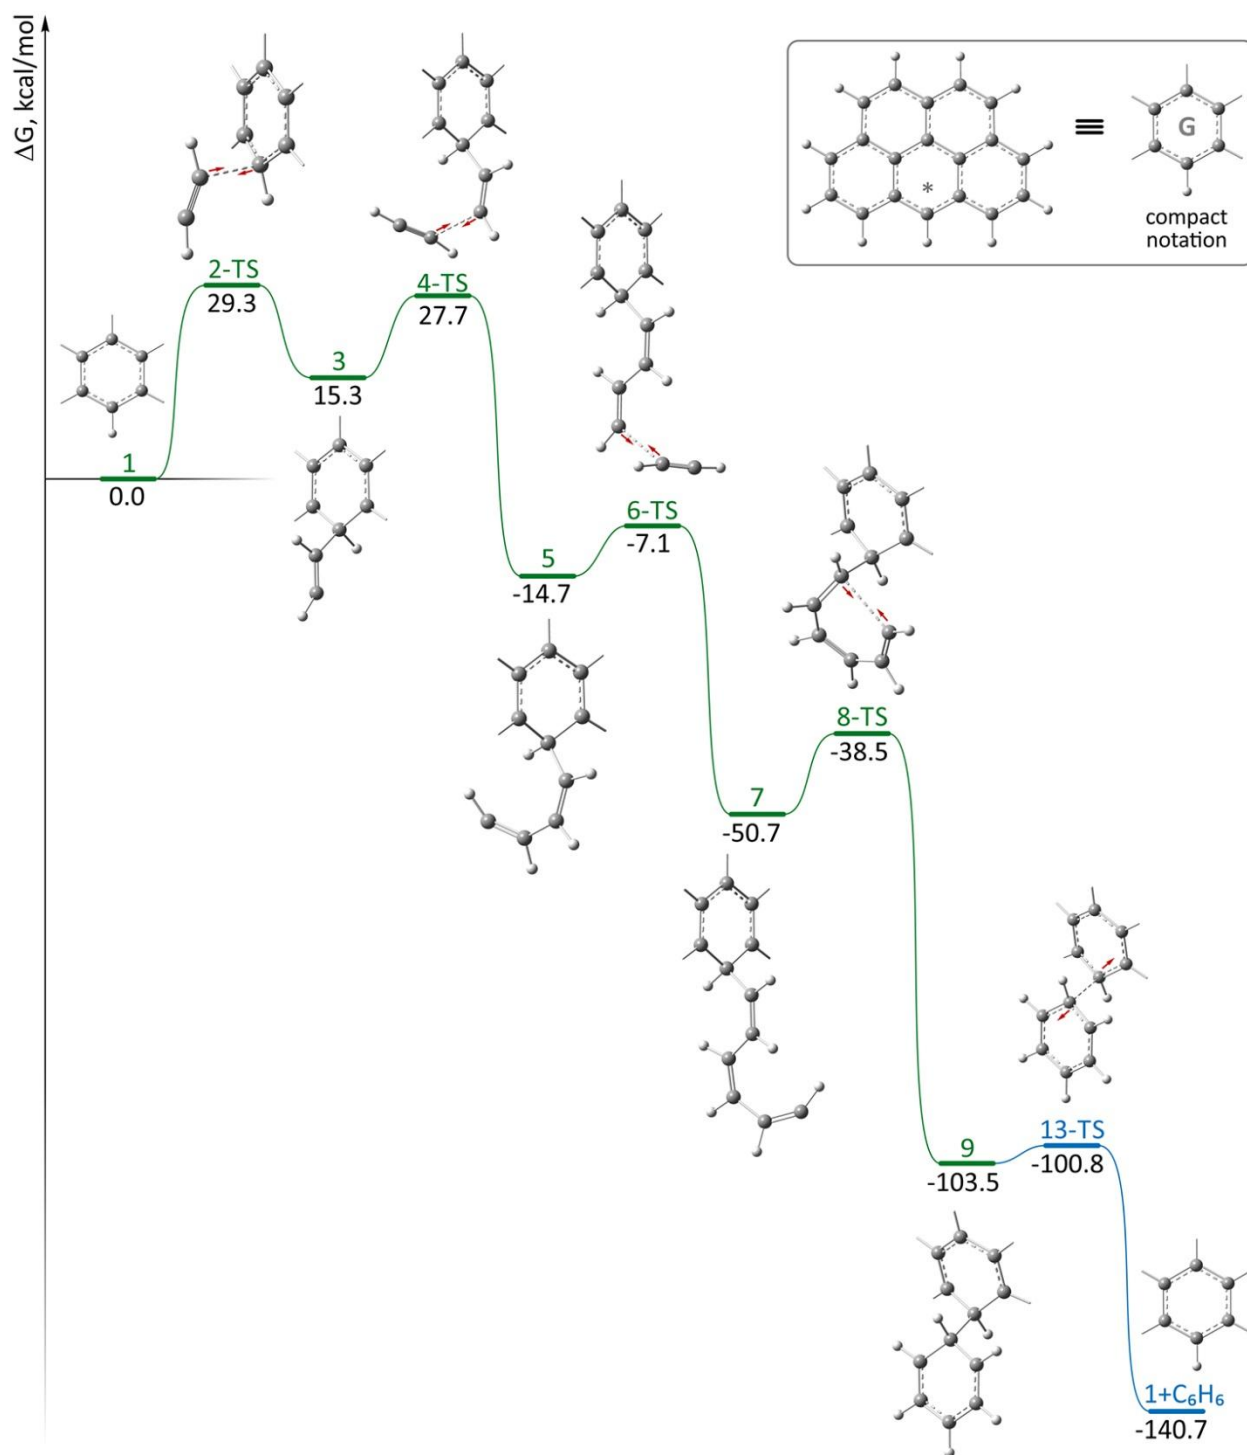

**Figure S17.** Free energy profile of acetylene cyclotrimerization reaction ( $\Delta G$ ) with  $C_{19}H_{11}$  polyaromatic hydrocarbon (olympicenyl radical) as a catalyst; single point calculations at UPBE1PBE/6-311++G(d,p) level for geometries optimized at UPBE1PBE/6-31G(d) level.

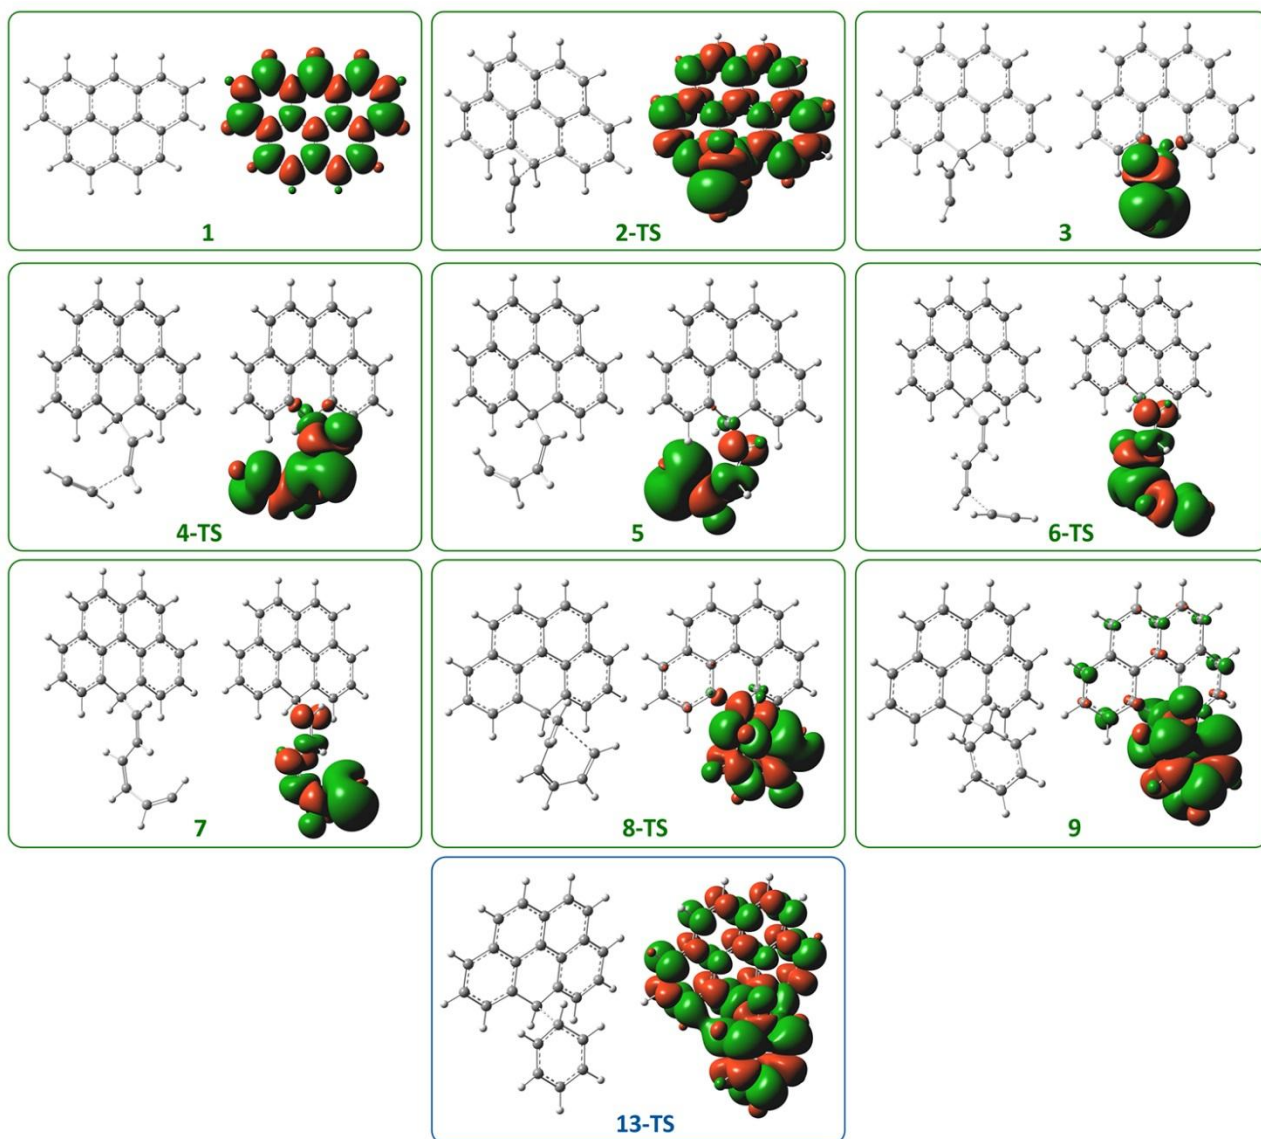

**Figure S18.** Spin density distributions in the stationary points **1** – **13-TS** for  $C_{19}H_{11}$  carbocatalyst; UPBE1PBE/6-31G(d) level.

## 5. Acetylene trimerization with non-Kekulé C<sub>25</sub>H<sub>12</sub> carbocatalyst

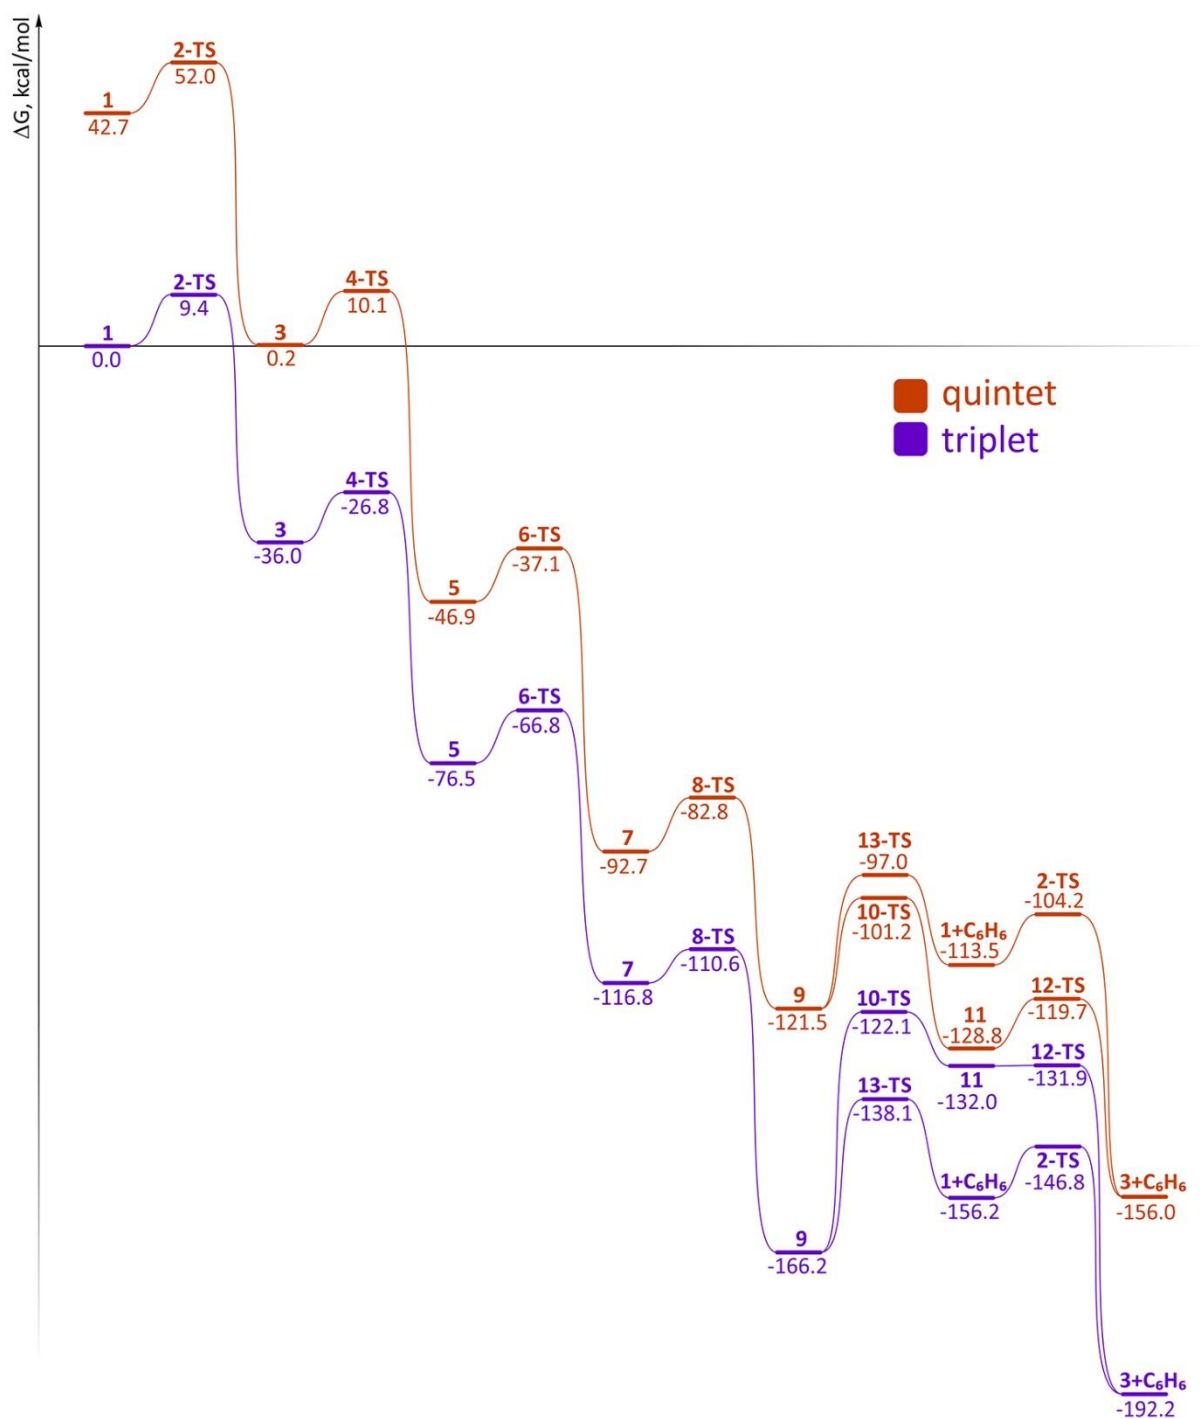

**Figure S19.** Free energy profile of acetylene cyclotrimerization reaction ( $\Delta G$ ) with C<sub>25</sub>H<sub>12</sub> polyaromatic hydrocarbon as a catalyst in triplet and quintet spin states; UPBE1PBE/6-31G(d) level.

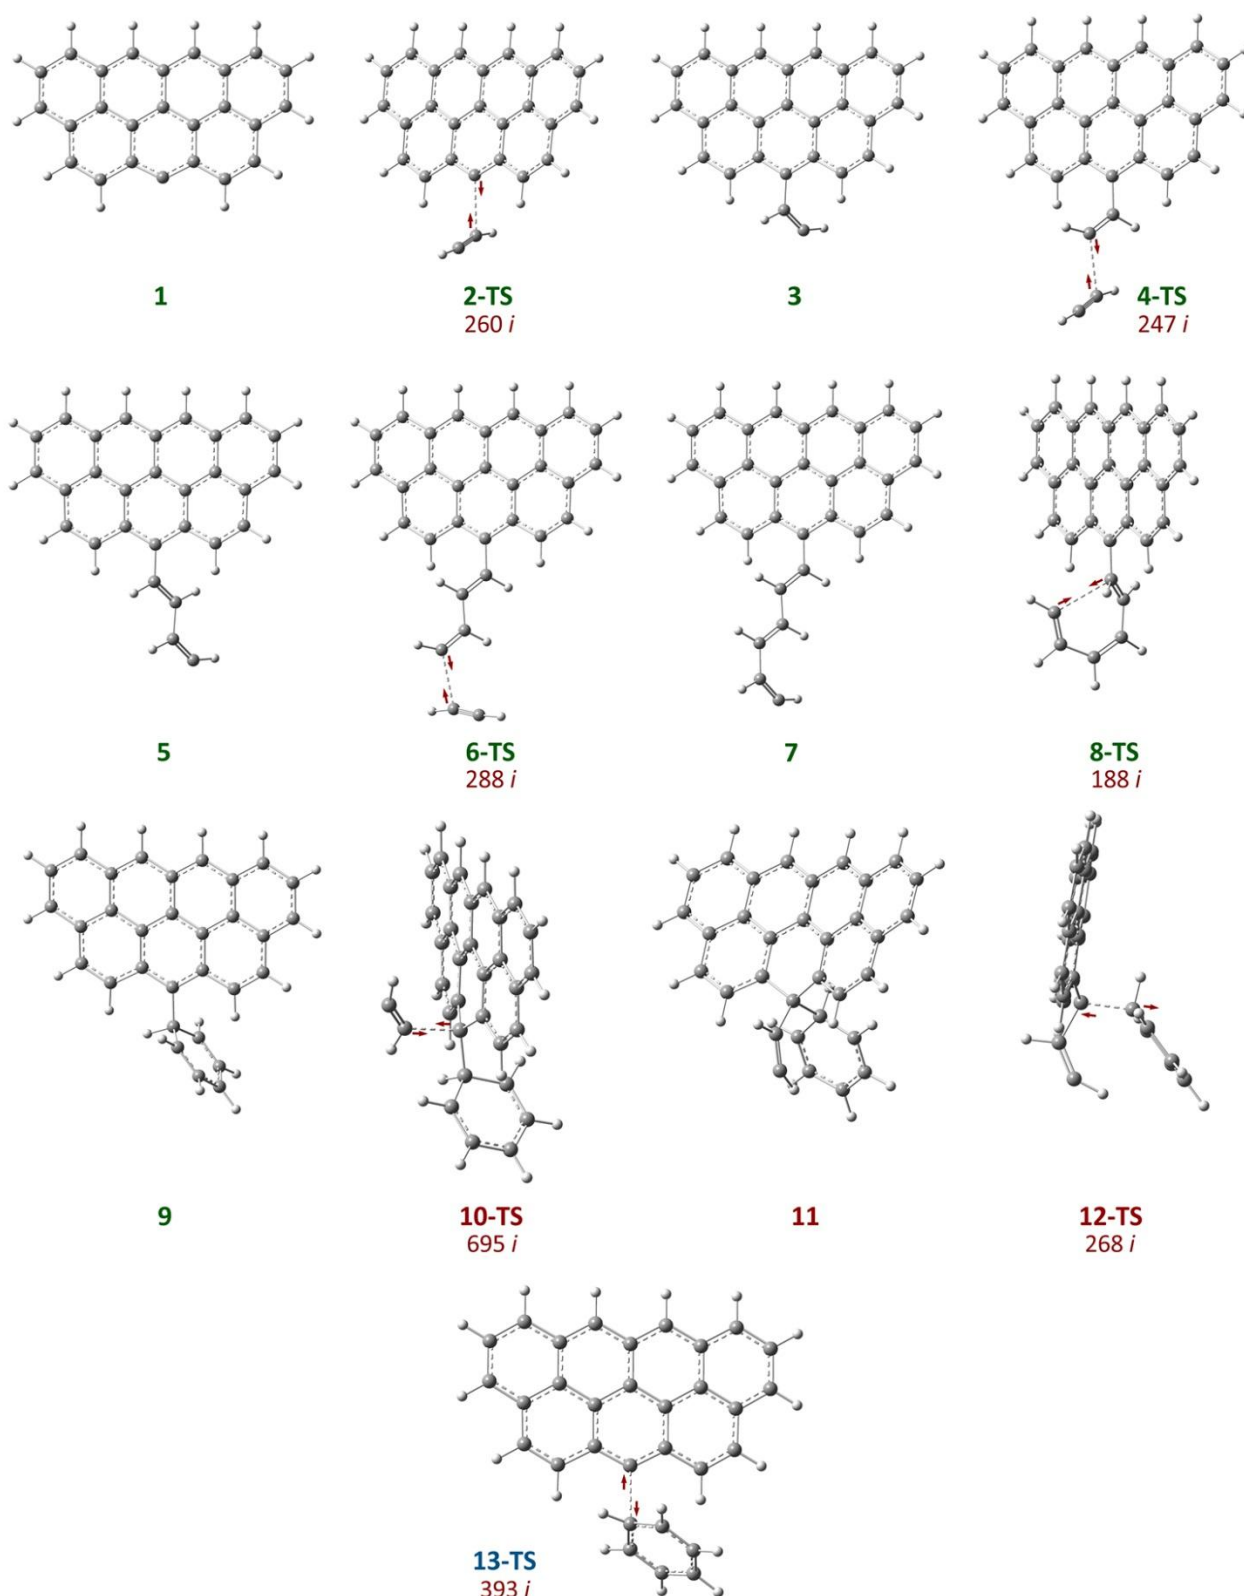

**Figure S20.** Optimized molecular structures of stationary points **1** – **13-TS** for the  $C_{25}H_{12}$  polyaromatic hydrocarbon in triplet spin state. For each transition state, the imaginary frequency is shown; directions of atomic movements corresponding to imaginary frequencies are shown by red arrows; UPBE1PBE/6-31G(d) level.



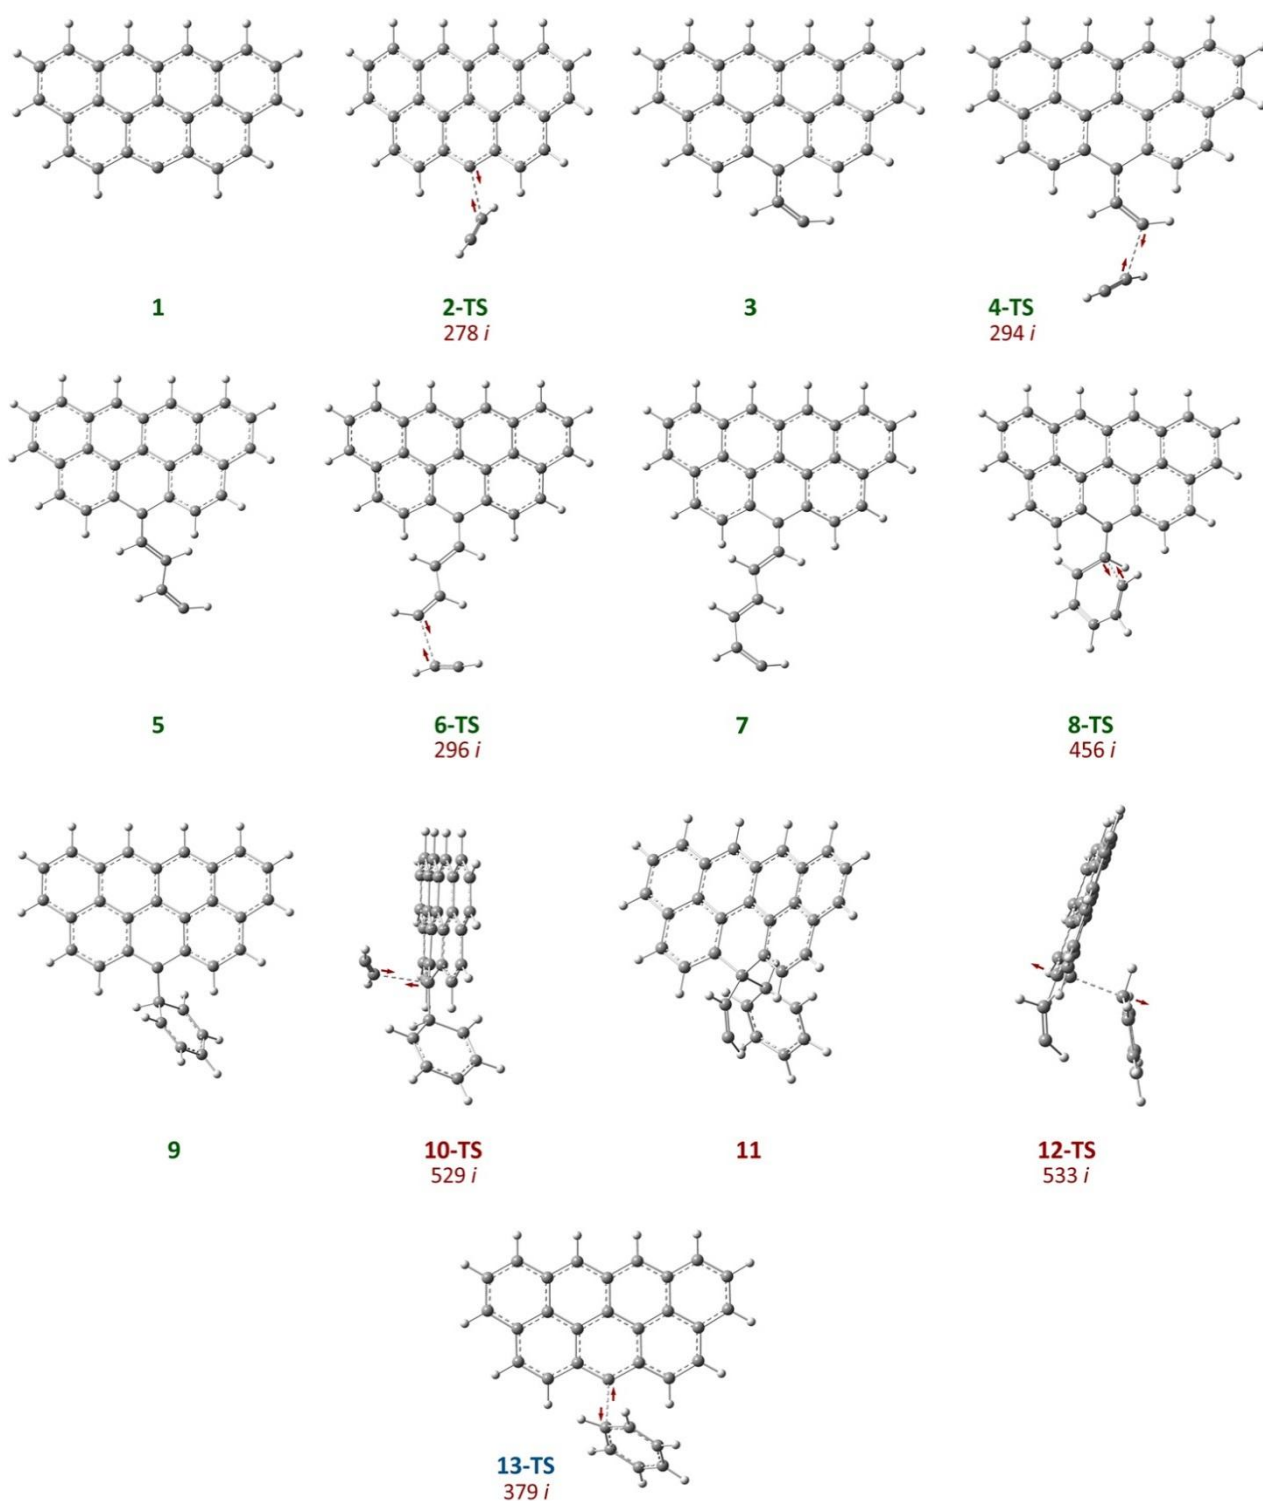

**Figure S21.** Optimized molecular structures of stationary points **1** – **13-TS** for the  $C_{25}H_{12}$  polyaromatic hydrocarbon in quintet spin state. For each transition state, the imaginary frequency is shown; directions of atomic movements corresponding to imaginary frequencies are shown by red arrows; UPBE1PBE/6-31G(d) level.



## 6. Acetylene trimerization with phenyl monoradical as a carbocatalyst

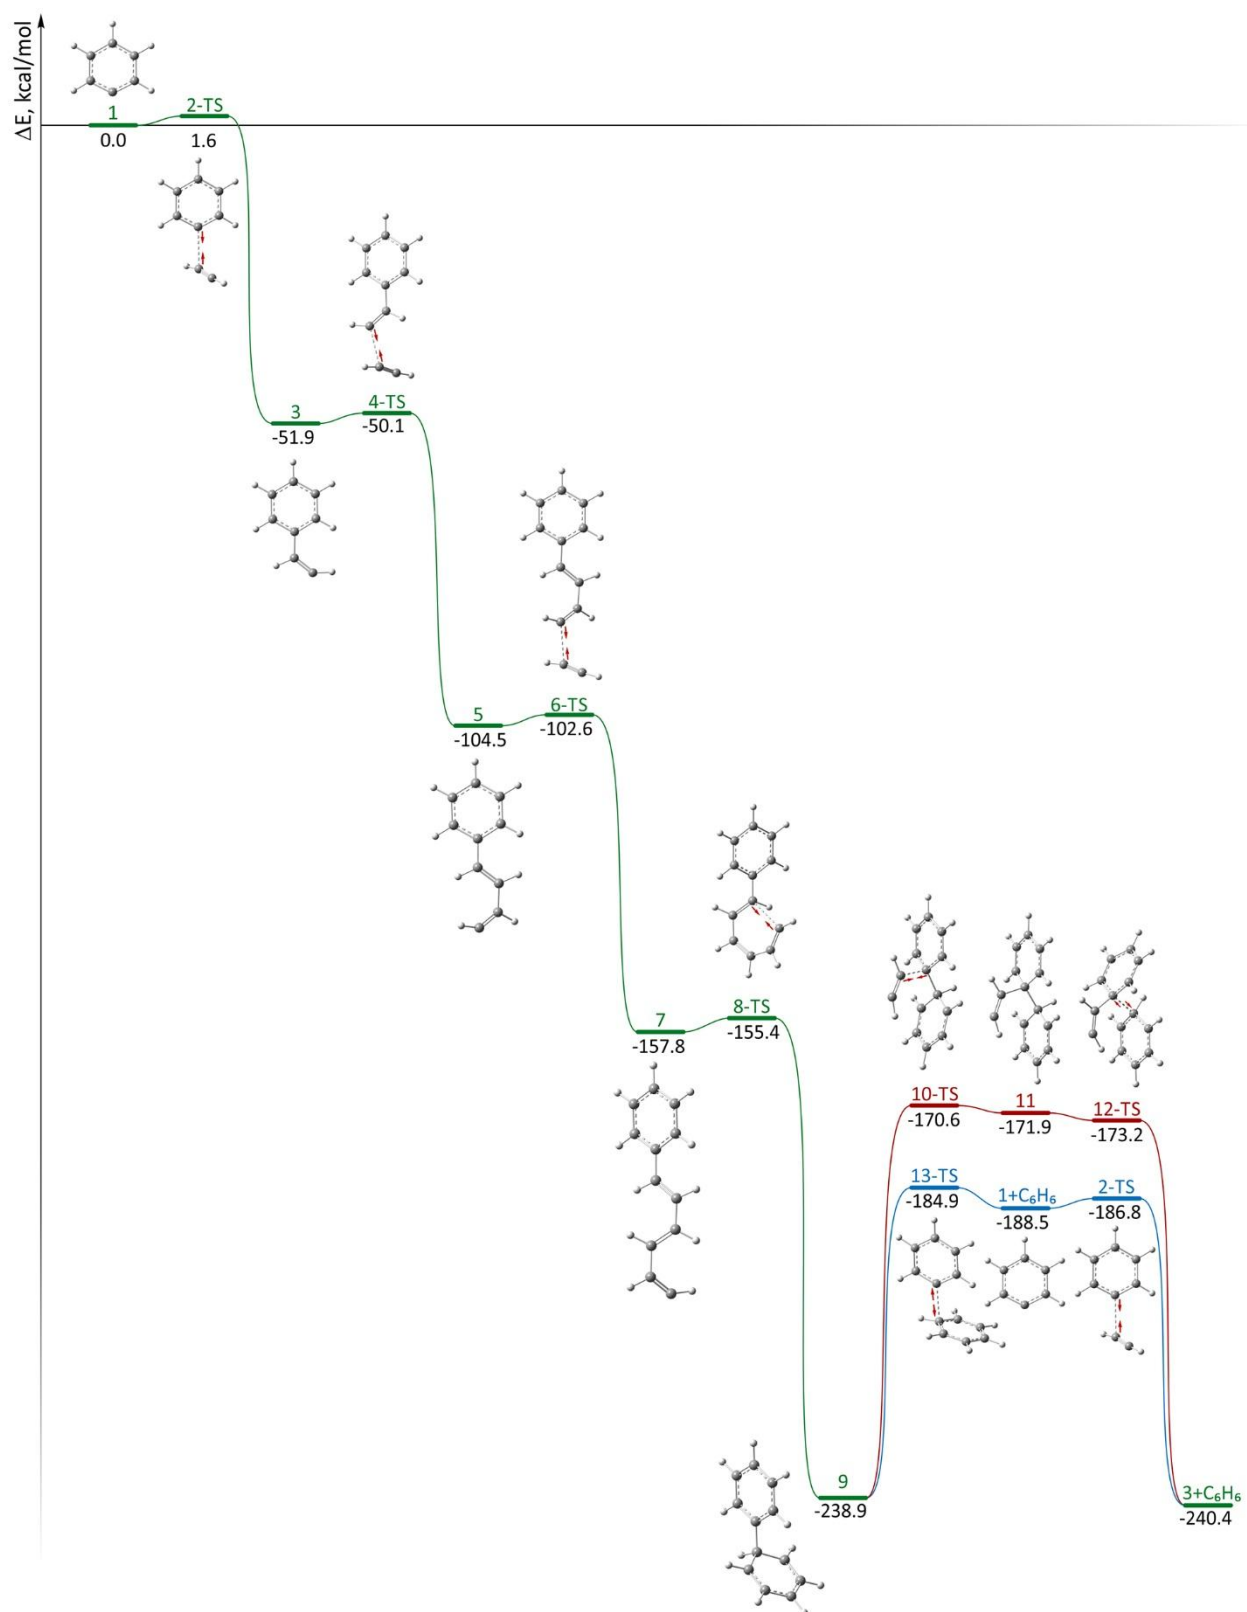

**Figure S22.** Total energy profile ( $\Delta E$ ) of acetylene cyclotrimerization reaction with  $C_6H_5$  monoradical as a catalyst; UPBE1PBE/6-31G(d) level.

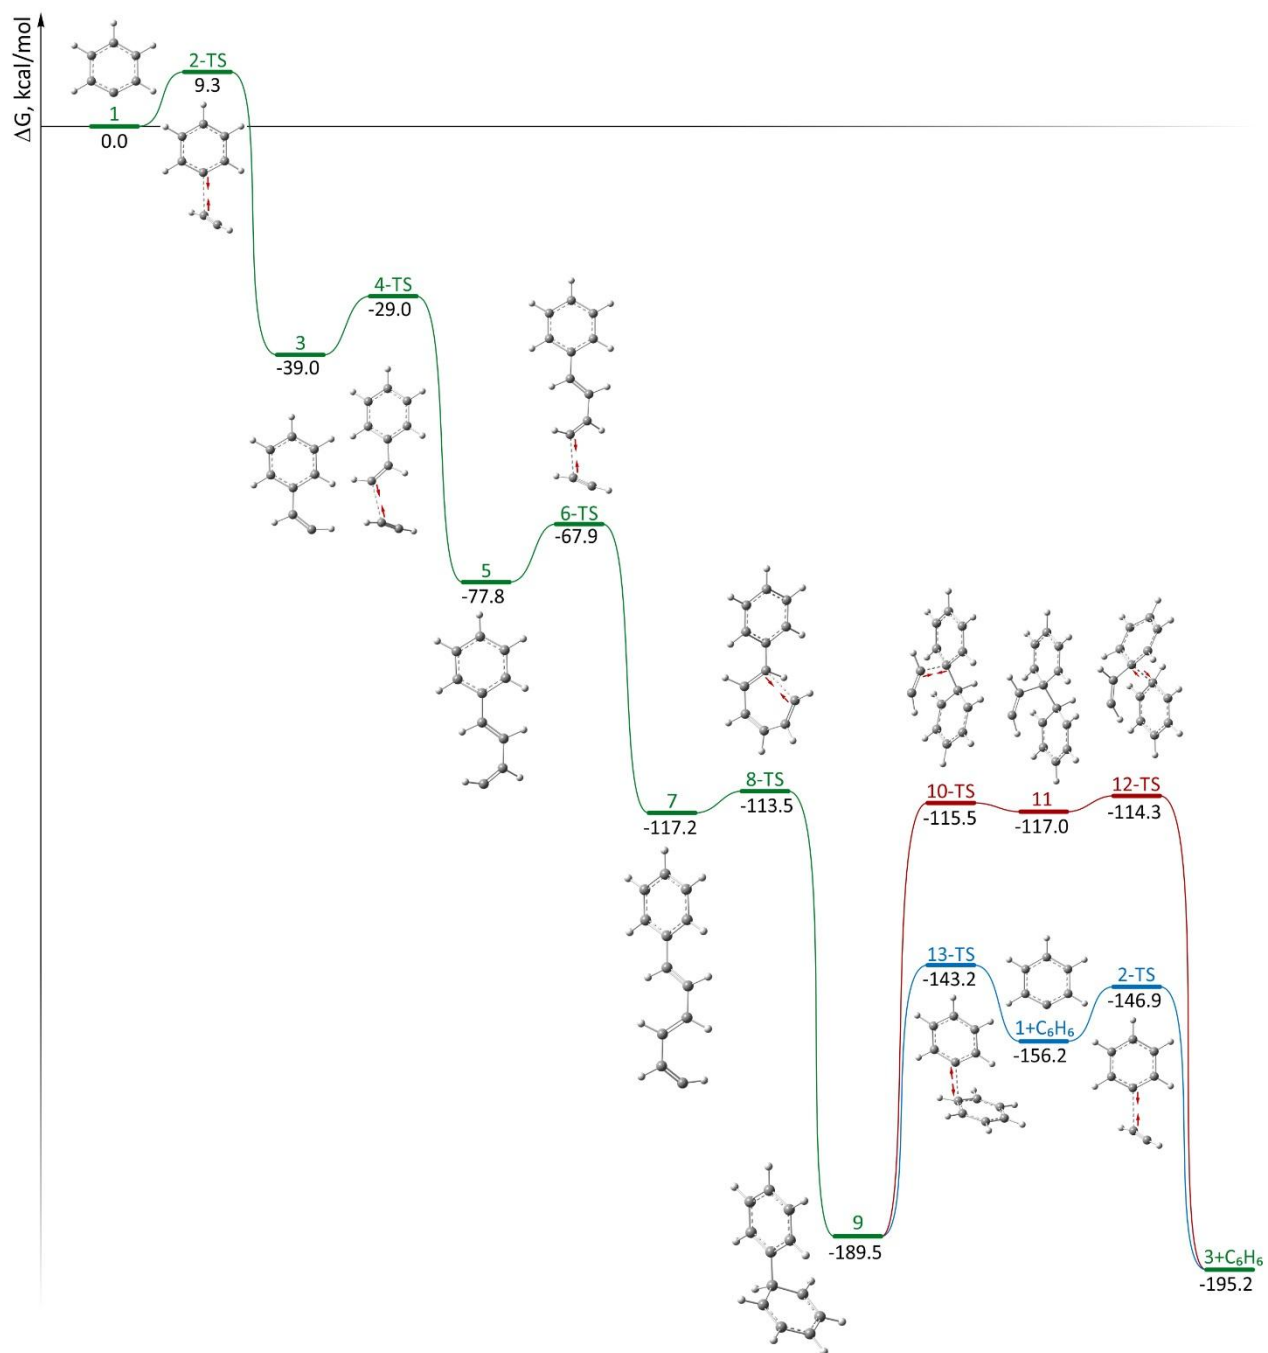

**Figure S23.** Free energy profile ( $\Delta G$ ) of acetylene cyclotrimerization reaction with C<sub>6</sub>H<sub>5</sub> monoradical as a catalyst; UPBE1PBE/6-31G(d) level.

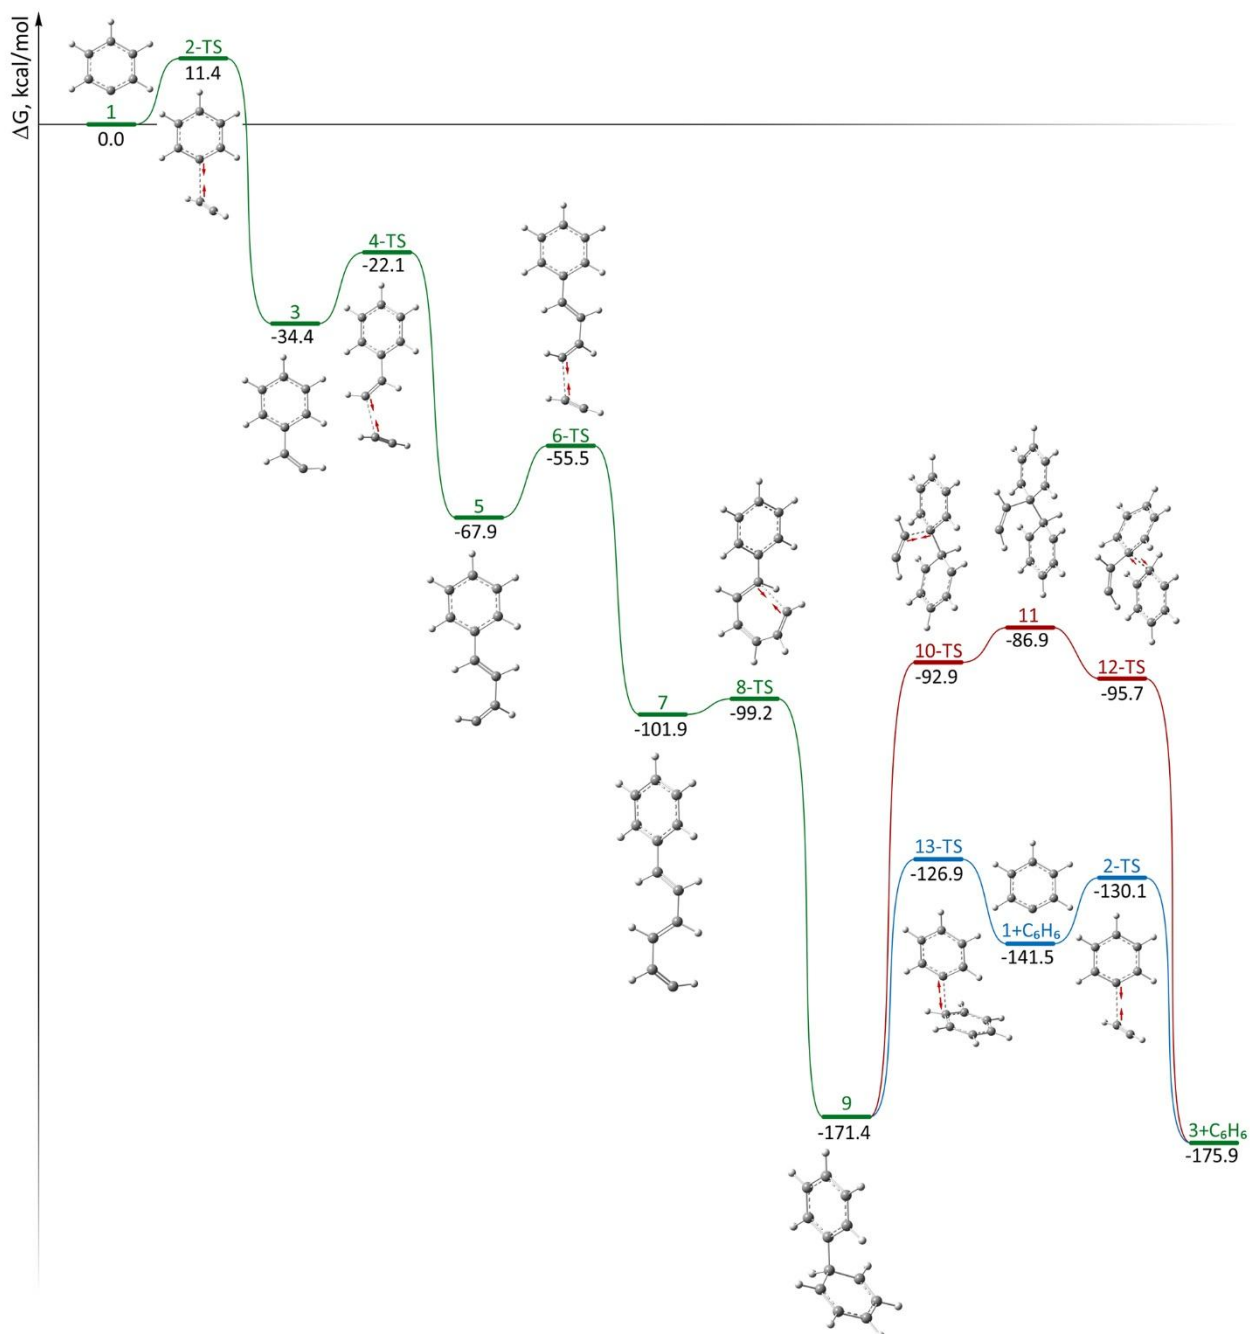

**Figure S24.** Free energy profile ( $\Delta G$ ) of acetylene cyclotrimerization reaction with C<sub>6</sub>H<sub>5</sub> monoradical as a catalyst; single point calculations at UPBE1PBE/6-311++G(d,p) level for geometries optimized at UPBE1PBE/6-31G(d) level.

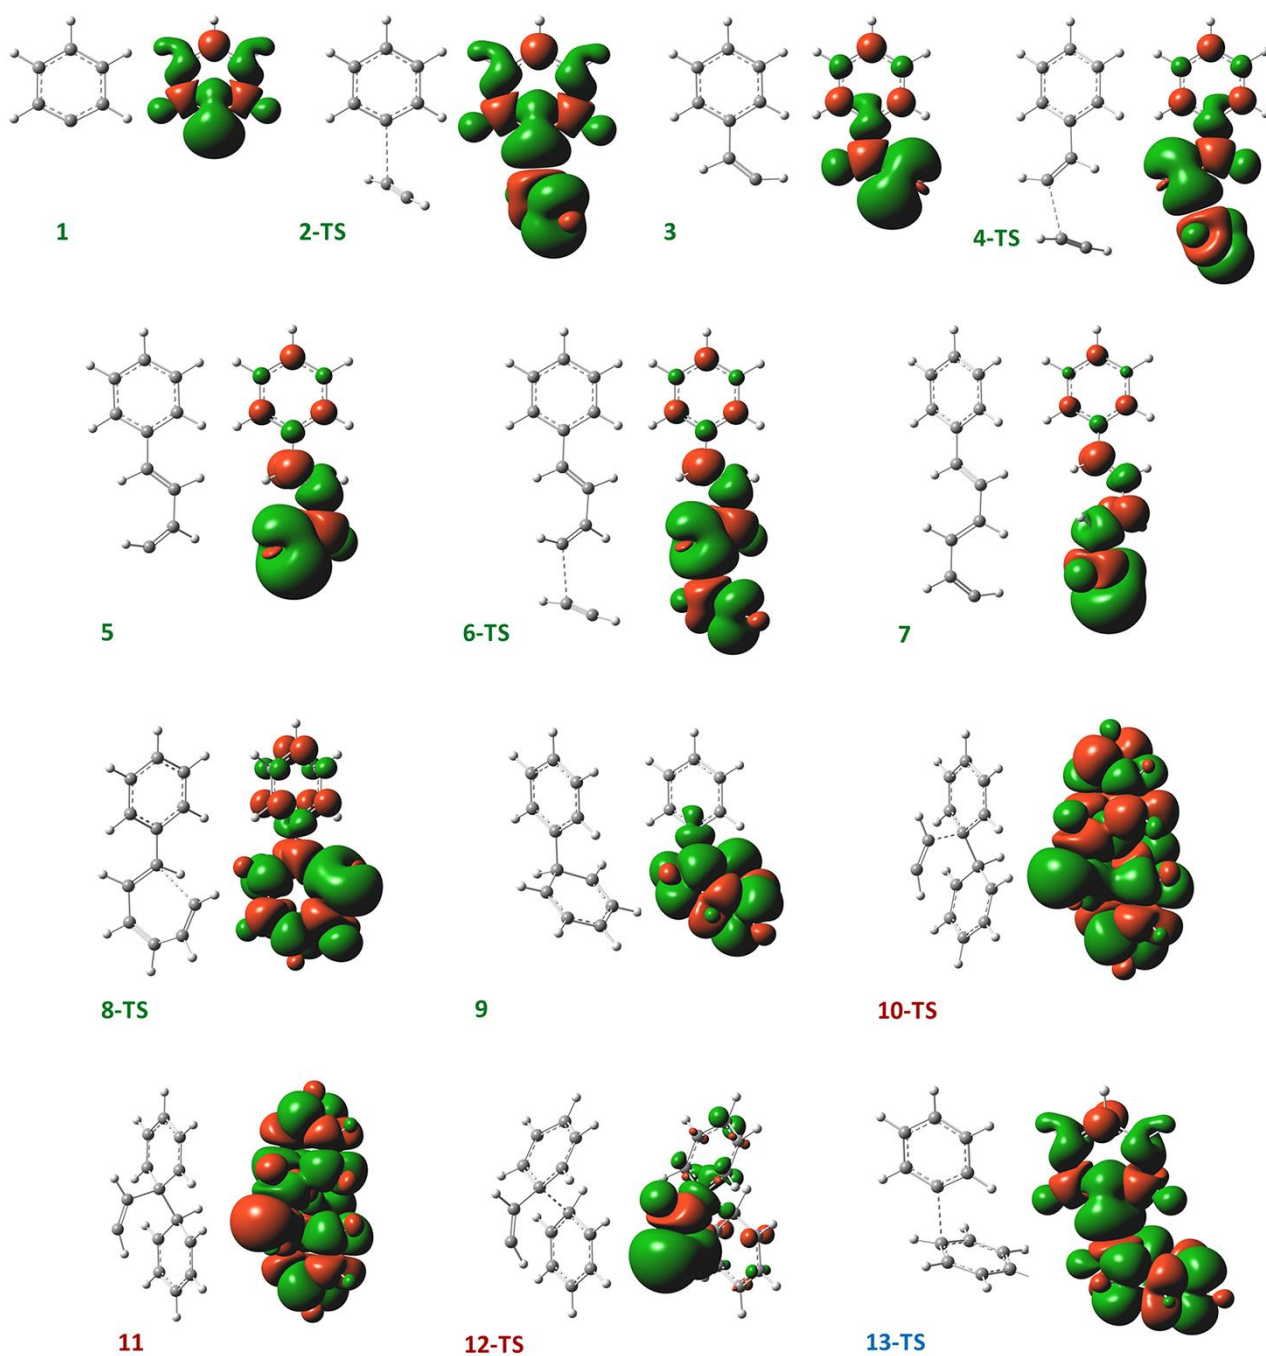

**Figure S25.** Spin density distributions in the stationary points **1** – **13-TS** for  $\text{C}_6\text{H}_5$  carbocatalyst; UPBE1PBE/6-31G(d) level.

## 7. Evaluation of the theoretical calculations accuracy for different basis sets and theory levels

**Table S1.** Total energy values ( $\Delta E$ ) calculated for each stage of acetylene cyclotrimerization process with  $C_{14}H_{10}$  carbene as a carbocatalyst at the different levels of theory.

| Level of theory                     | 1   | 2-TS | 3     | 4-TS  | 5      | 6-TS   | 7      | 8-TS   | 9      | 10-TS  | 11     | 12-TS  | 13-TS  | 1+C <sub>6</sub> H <sub>6</sub> |
|-------------------------------------|-----|------|-------|-------|--------|--------|--------|--------|--------|--------|--------|--------|--------|---------------------------------|
| UPBE1PBE/6-31G(d)                   | 0.0 | 1.2  | -52.0 | -49.8 | -108.9 | -107.2 | -160.9 | -159.8 | -208.3 | -187.4 | -219.4 | -210.9 | -182.3 | -188.5                          |
| UPBE1PBE/6-311++G(d,p) <sup>†</sup> | 0.0 | 3.0  | -47.0 | -43.4 | -98.8  | -95.0  | -145.4 | -144.3 | -191.6 | -168.5 | -198.3 | -190.2 | -165.8 | -172.9                          |
| UM062X/6-311++G(d,p) <sup>†</sup>   | 0.0 | 2.4  | -43.5 | -39.8 | -89.7  | -86.2  | -130.8 | -130.1 | -175.4 | -156.0 | -185.2 | -176.5 | -151.9 | -156.8                          |

<sup>†</sup> - single point calculations of molecular structures optimized at the UPBE1PBE/6-31G(d) level.

**Table S2.** Total energy values ( $\Delta E$ ) of (9 → 10-TS → 11 → 12-TS; 13-TS → 1) potential energy profile segments (see Figures 1 and 2) for C<sub>6</sub> carbocatalyst at the different theory levels.

| Level of theory                           | 1   | 9      | 10-TS  | 11     | 12-TS  | 13-TS  | 1+benzene |
|-------------------------------------------|-----|--------|--------|--------|--------|--------|-----------|
| UPBE1PBE/6-31G(d)                         | 0.0 | -213.5 | -194.0 | -216.8 | -213.0 | -184.6 | -188.5    |
| UB3LYP/6-31G(d) <sup>†</sup>              | 0.0 | -190.3 | -167.0 | -185.5 | -183.9 | -165.0 | -170.5    |
| UPBE1PBE/6-311+G(2d,p) <sup>†</sup>       | 0.0 | -197.6 | -176.2 | -197.0 | -193.7 | -169.3 | -174.1    |
| UPBE1PBE/6-311+G(2d,p) GD3BJ <sup>†</sup> | 0.0 | -205.4 | -188.6 | -209.4 | -205.8 | -176.9 | -178.0    |
| UCCSD/6-31G(d) <sup>†</sup>               | 0.0 | -178.3 | -155.1 | -180.1 | -171.5 | -148.1 | -155.5    |
| UCCSD(T)/6-31G(d) <sup>†</sup>            | 0.0 | -179.5 | -158.8 | -182.5 | -175.4 | -150.9 | -157.0    |

<sup>†</sup> - single point calculations for geometries optimized at the UPBE1PBE/6-31G(d) level.

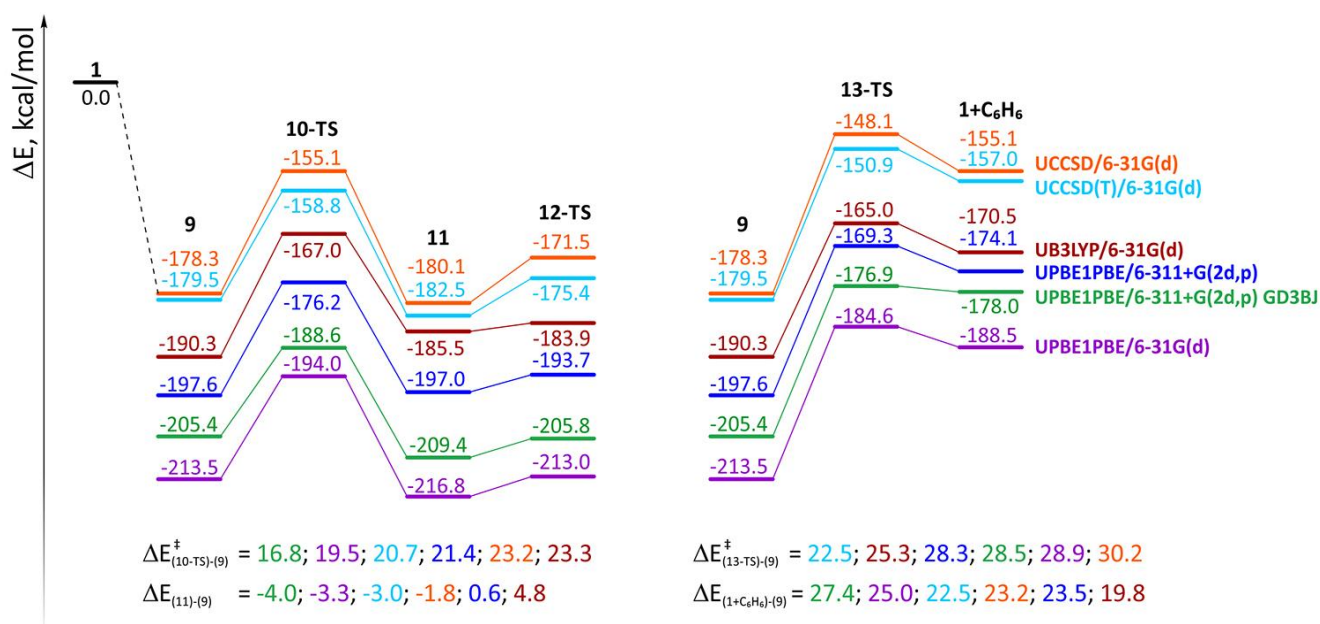

**Figure S26.** Segments of the total energy profile (9 → 10-TS → 11 → 12-TS and 9 → 13-TS → 1+C<sub>6</sub>H<sub>6</sub> see Figures 1 and 2) for C<sub>6</sub> carbocatalyst calculated by different theory levels.



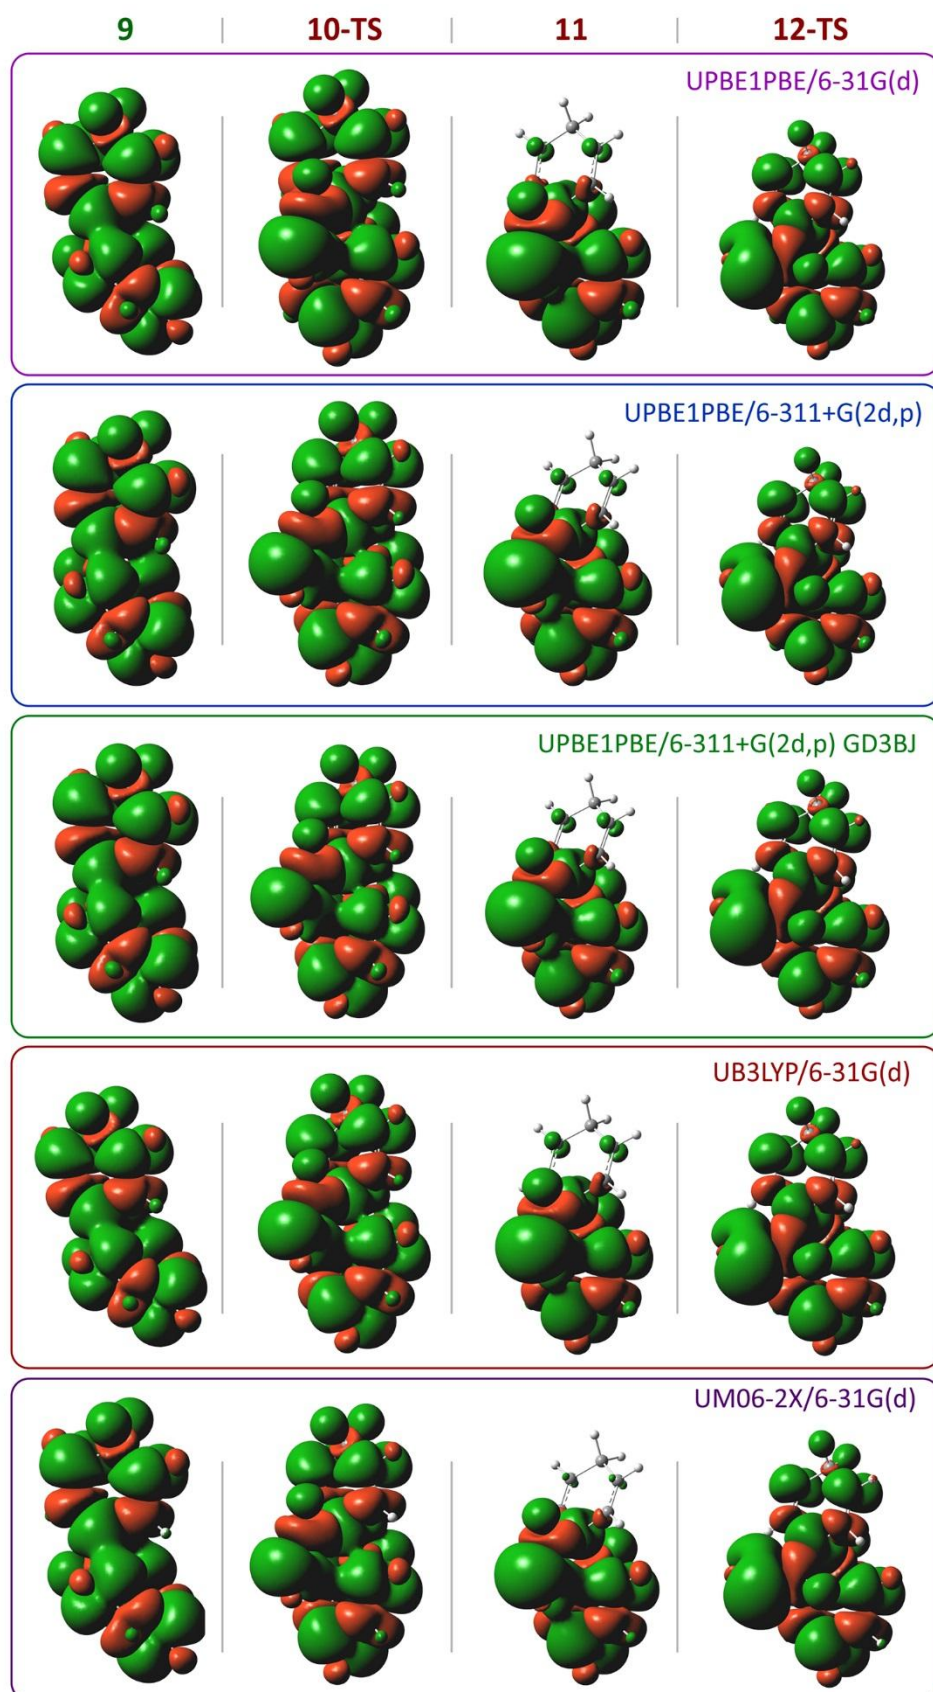

**Figure S27.** Spin density distributions in stationary points **9**, **10-TS**, **11** and **12-TS** for the C<sub>6</sub> model carbocatalyst calculated at the different theory levels.

## 8. Evaluation of graphene systems of different sizes

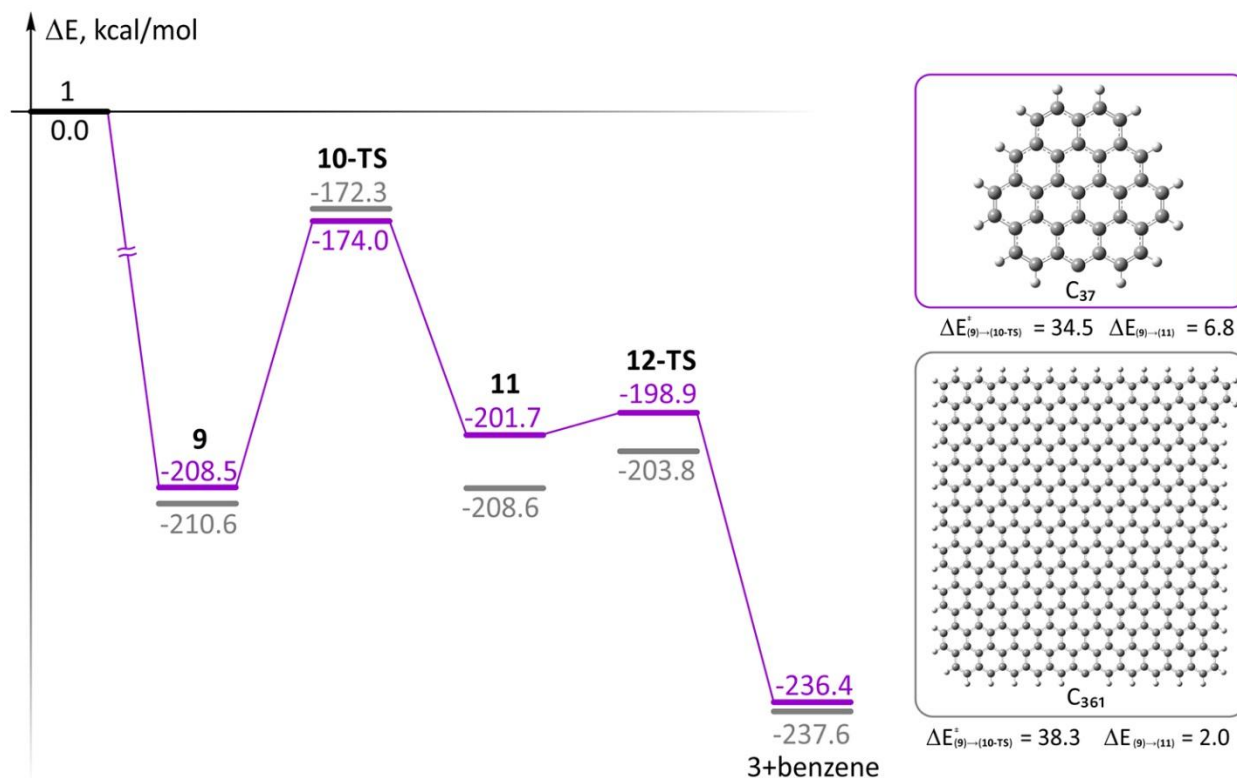

**Figure S28.** Comparative representation of ( $9 \rightarrow 10\text{-TS} \rightarrow 11 \rightarrow 12\text{-TS}$ ) PES segments for  $C_{361}$  and  $C_{37}$  carbocatalyst models. The  $C_{37}$  structures were optimized at the UPBE1PBE/6-31G(d) level, and single point calculations were performed for the  $C_{361}$  structures at the UPBE1PBE/6-31G(d) level.



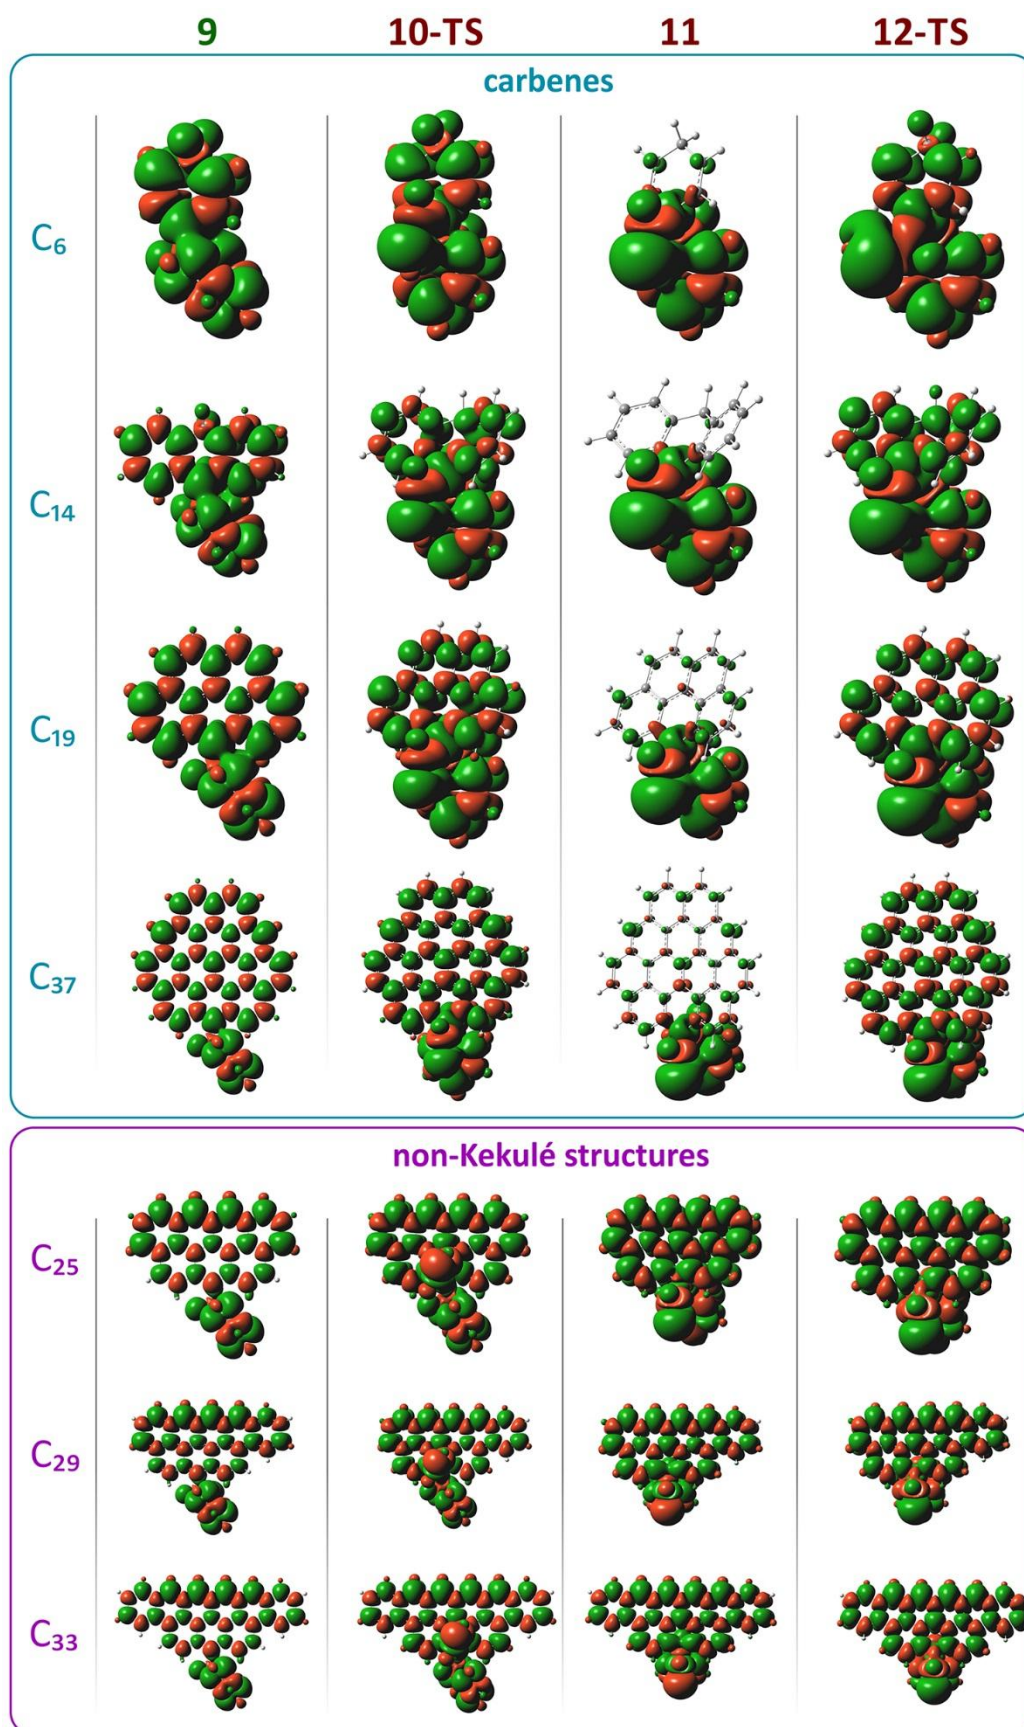

**Figure S29.** Spin density distributions in the stationary points **9**, **10-TS**, **11** and **12-TS** for different model carbocatalysts; UPBE1PBE/6-31G(d) level.

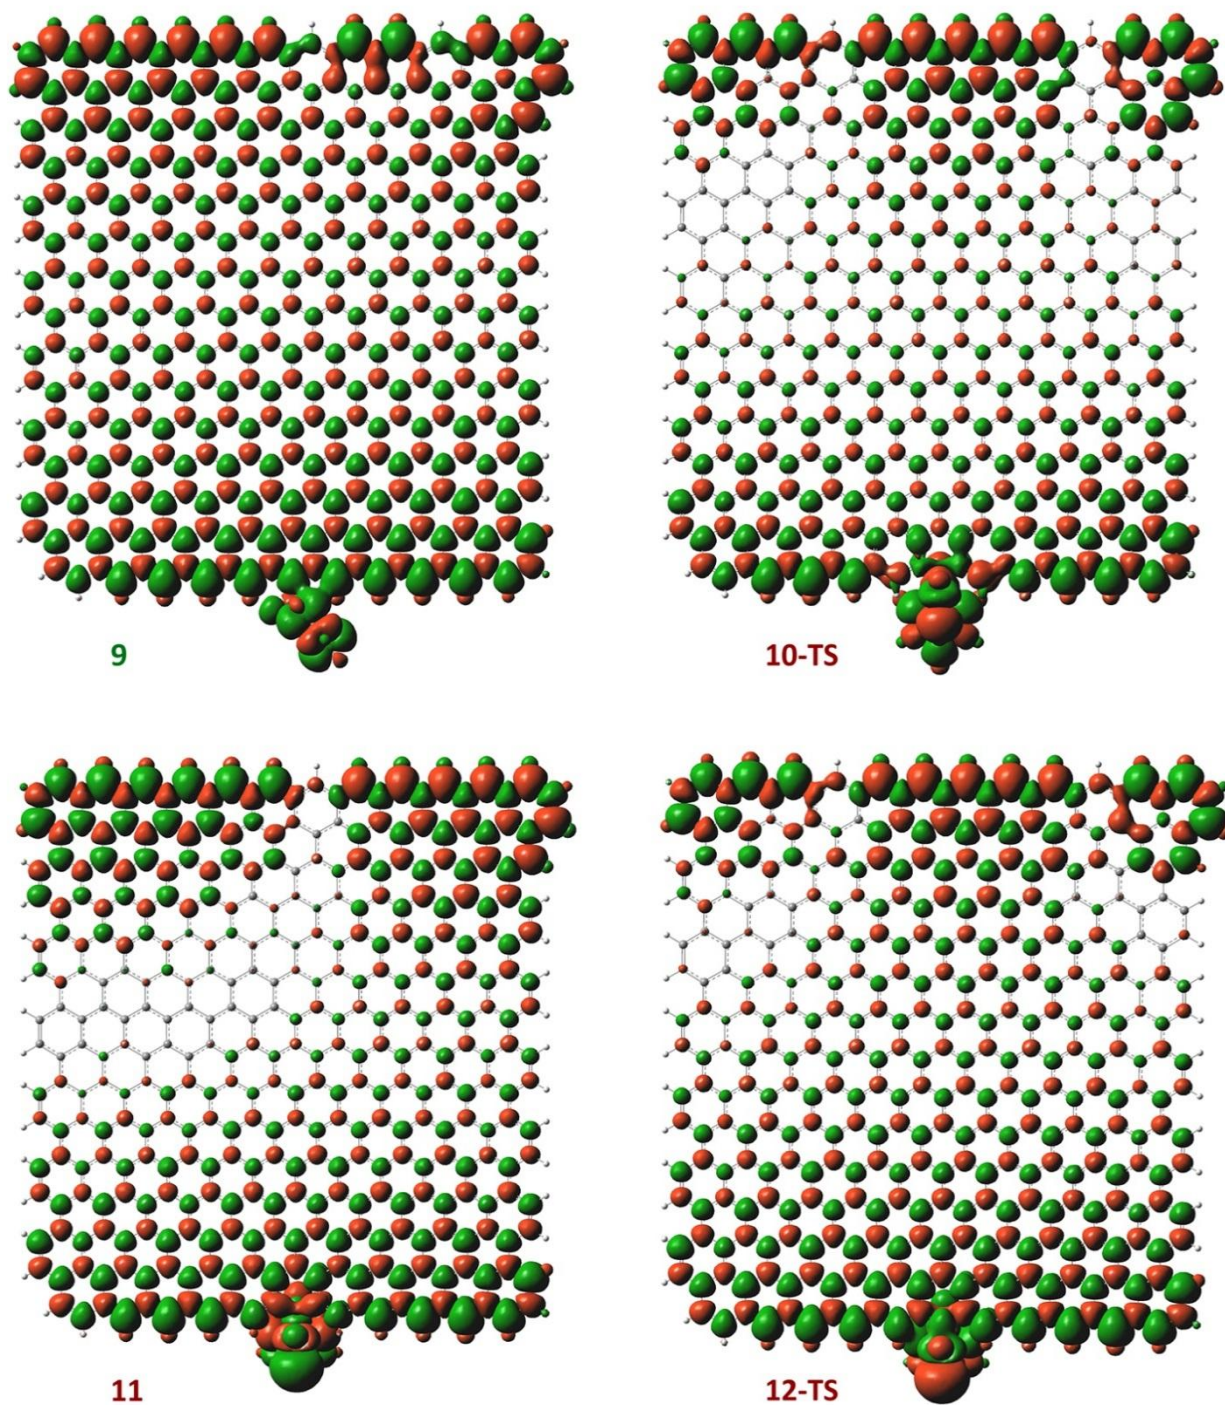

**Figure S30.** Spin density distributions in the stationary points **9**, **10-TS**, **11** and **12-TS** for  $C_{361}$  model carbocatalyst; single point calculations at the UPBE1PBE/6-31G(d) level.

## 9. Experimental benzene synthesis

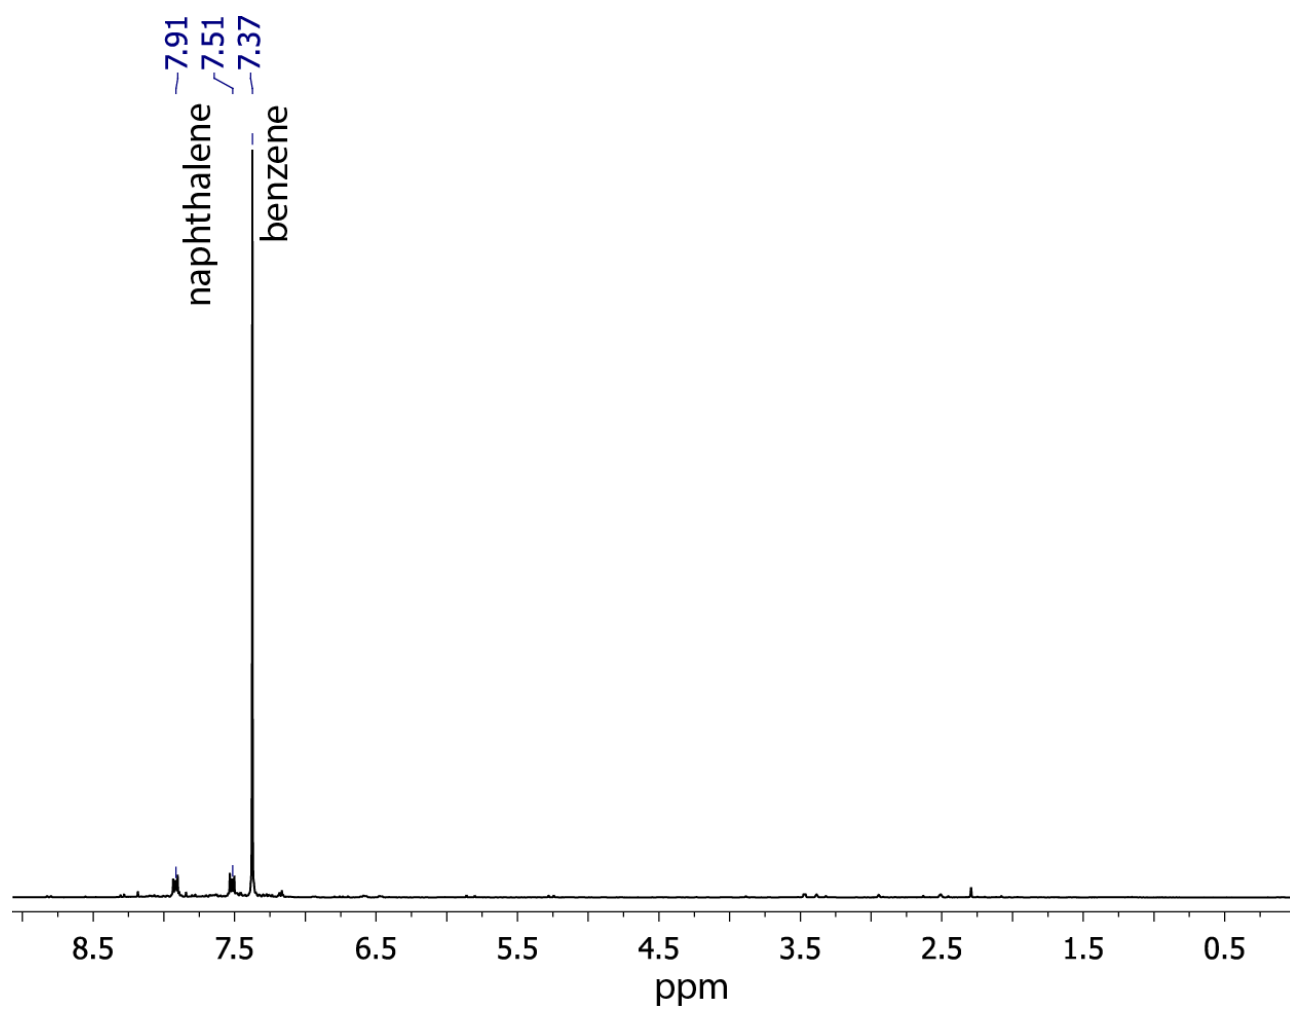

**Figure S31.**  $^1\text{H}$  NMR spectrum of the products after completion of the reaction (DMSO- $\text{d}_6$ , 300.1 MHz).



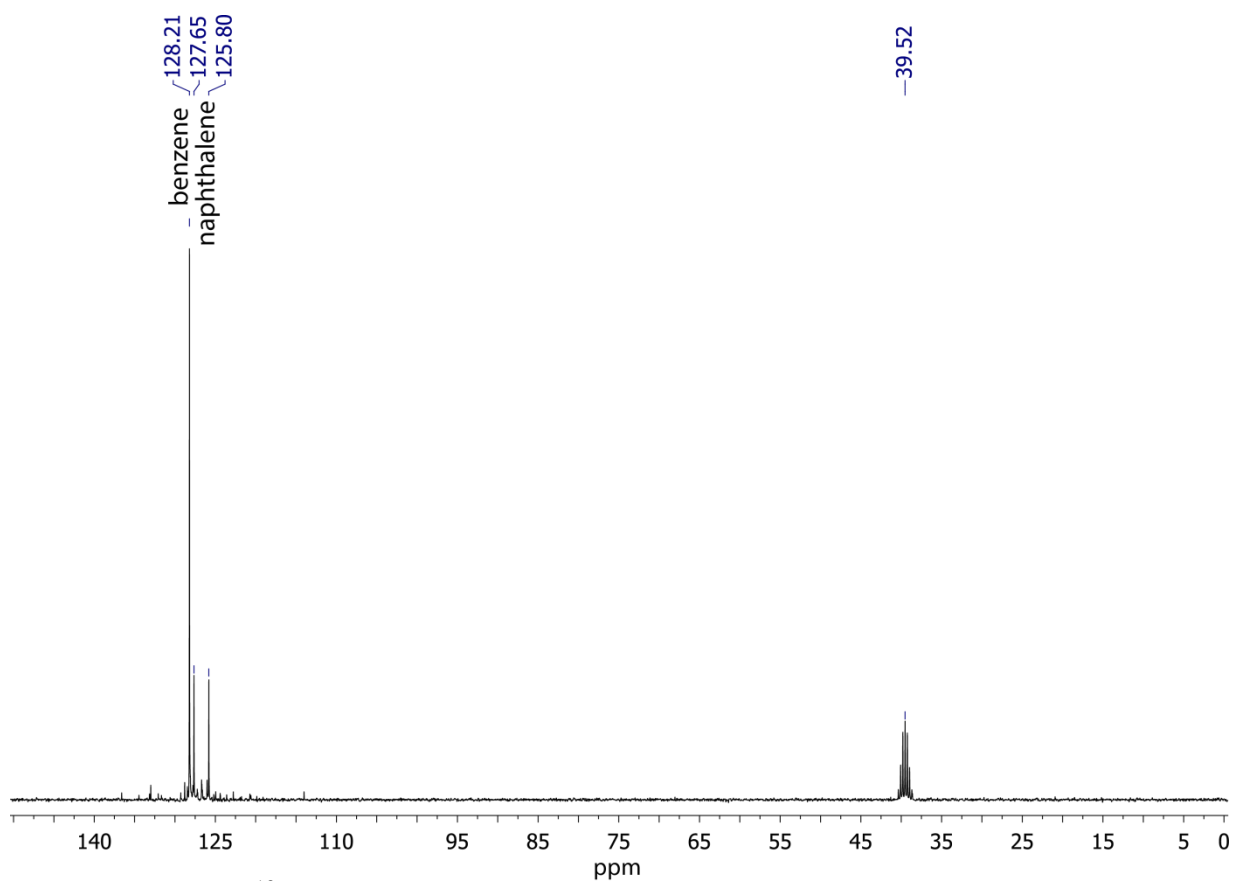

**Figure S32.** <sup>13</sup>C NMR spectrum of the products after completion of the reaction (DMSO-d<sub>6</sub>, 75 MHz).

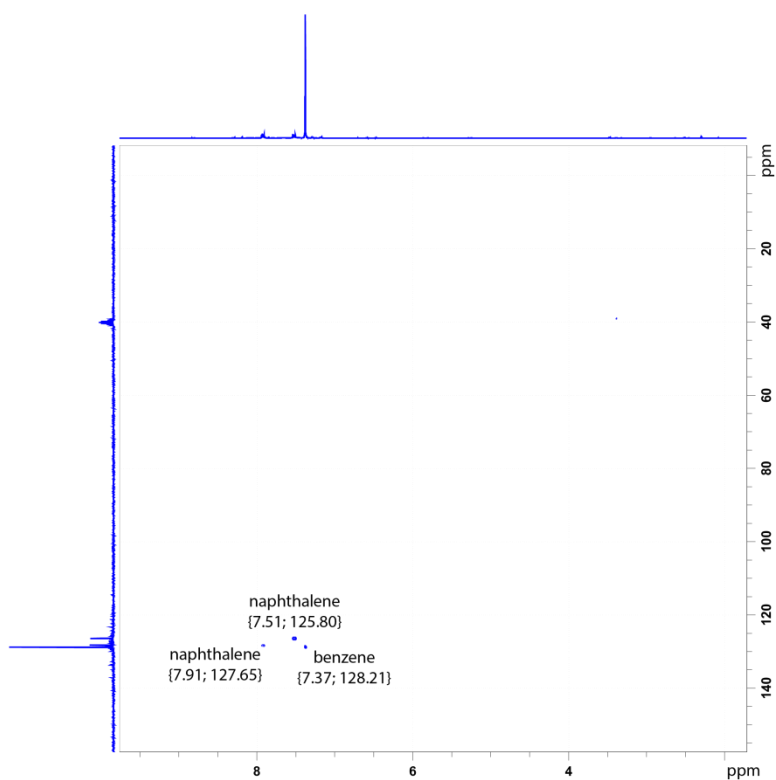

**Figure S33.** HSQC (<sup>1</sup>H-<sup>13</sup>C) spectrum of the products after completion of the reaction. The signal at 128.21 ppm in <sup>13</sup>C spectrum corresponds to the carbon atoms of benzene; the signals at 125.80 ppm and 127.65 ppm in <sup>13</sup>C spectrum correspond to the carbon atoms of naphthalene.

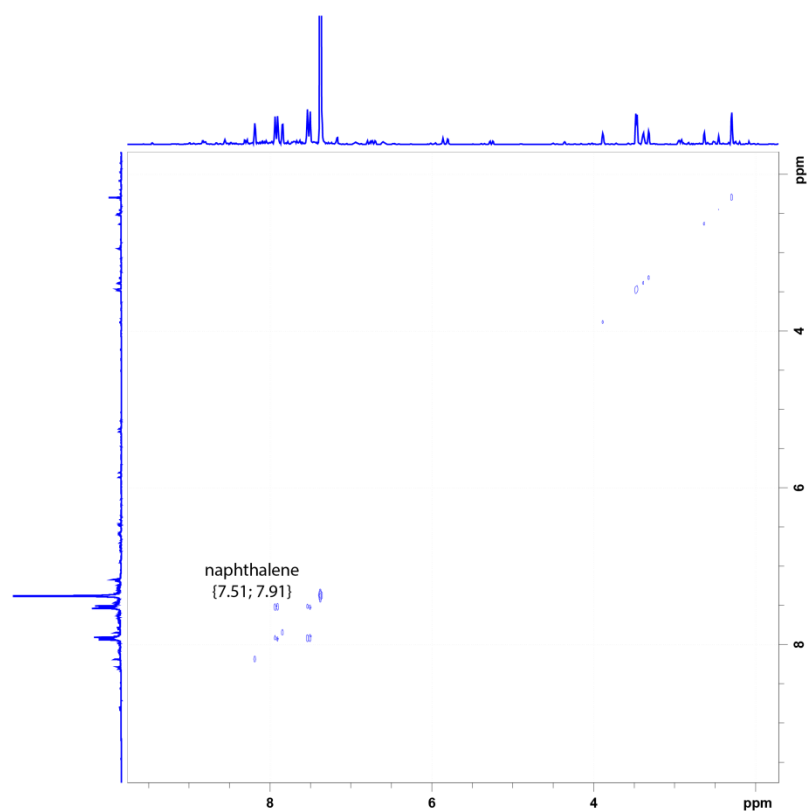

**Figure S34.** COSY ( $^1\text{H}$ - $^1\text{H}$ ) spectrum of the products after completion of the reaction. The signals at 7.51 ppm and 7.91 ppm in  $^1\text{H}$  spectrum correspond to the protons of naphthalene.

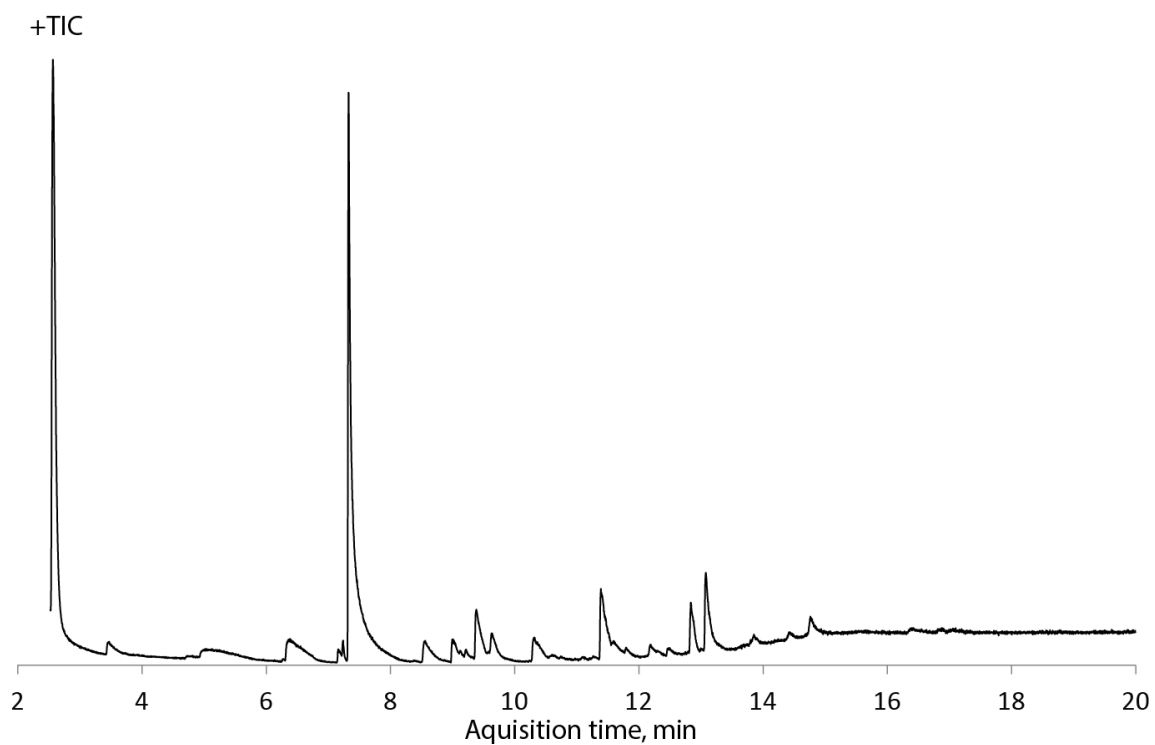

**Figure S35.** Gas chromatogram and mass spectrum of the reaction products after completion of the reaction.

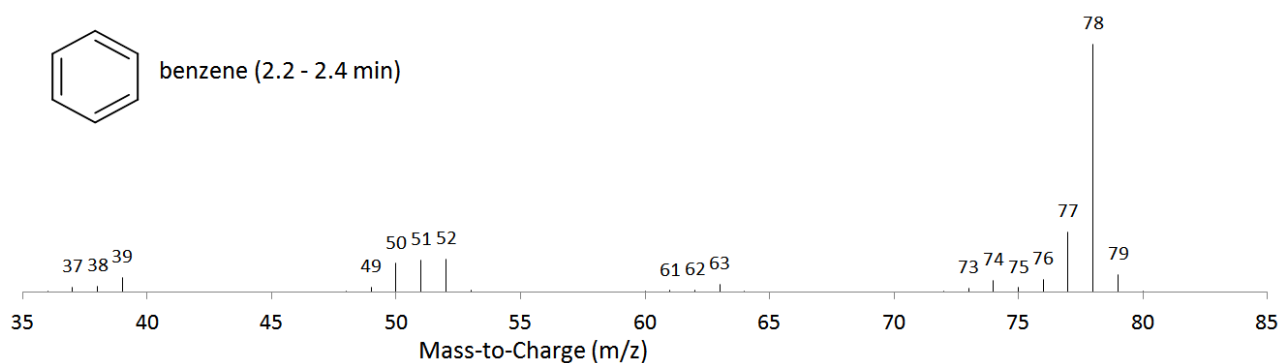

**Figure S36.** Mass spectrum of the fraction (retention time 2.2 – 2.4 min) corresponding to benzene.

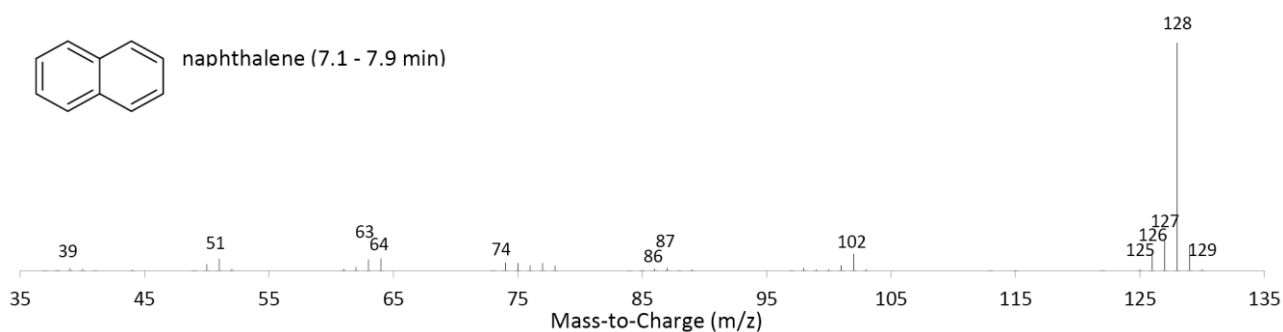

**Figure S37.** Mass spectrum of the fraction (retention time 7.1 – 7.9 min) corresponding to naphthalene.

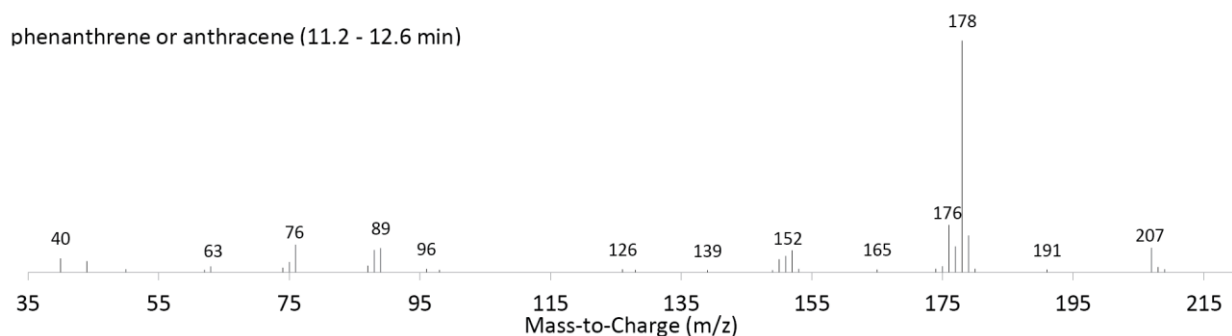

**Figure S38.** Mass spectrum of the fraction (retention time 11.2 – 12.6 min) corresponding to anthracene or phenanthrene.

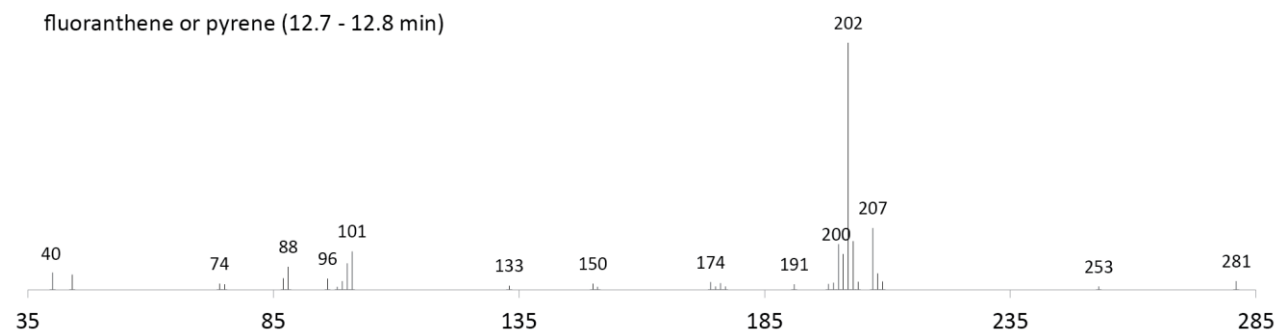

**Figure S39.** Mass spectrum of the fraction (retention time 12.7 – 12.8 min) corresponding to fluoranthene or pyrene.

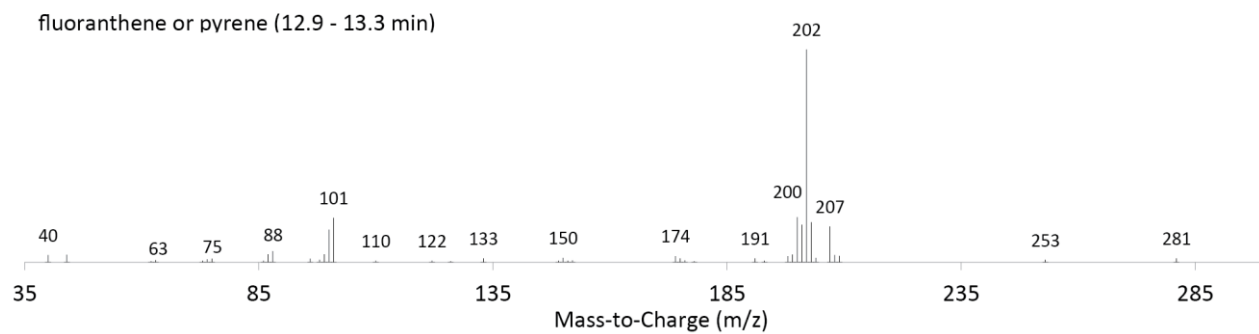

**Figure S40.** Mass spectrum of the fraction (retention time 12.9 – 13.3 min) corresponding to pyrene or fluoranthene.

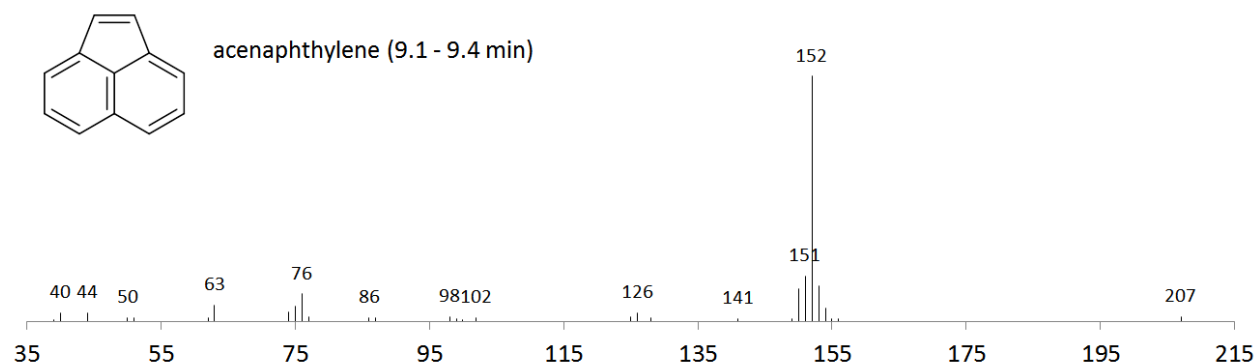

**Figure S41.** Mass spectrum of the fraction (retention time 9.1 – 9.4 min) corresponding to acenaphthylene.



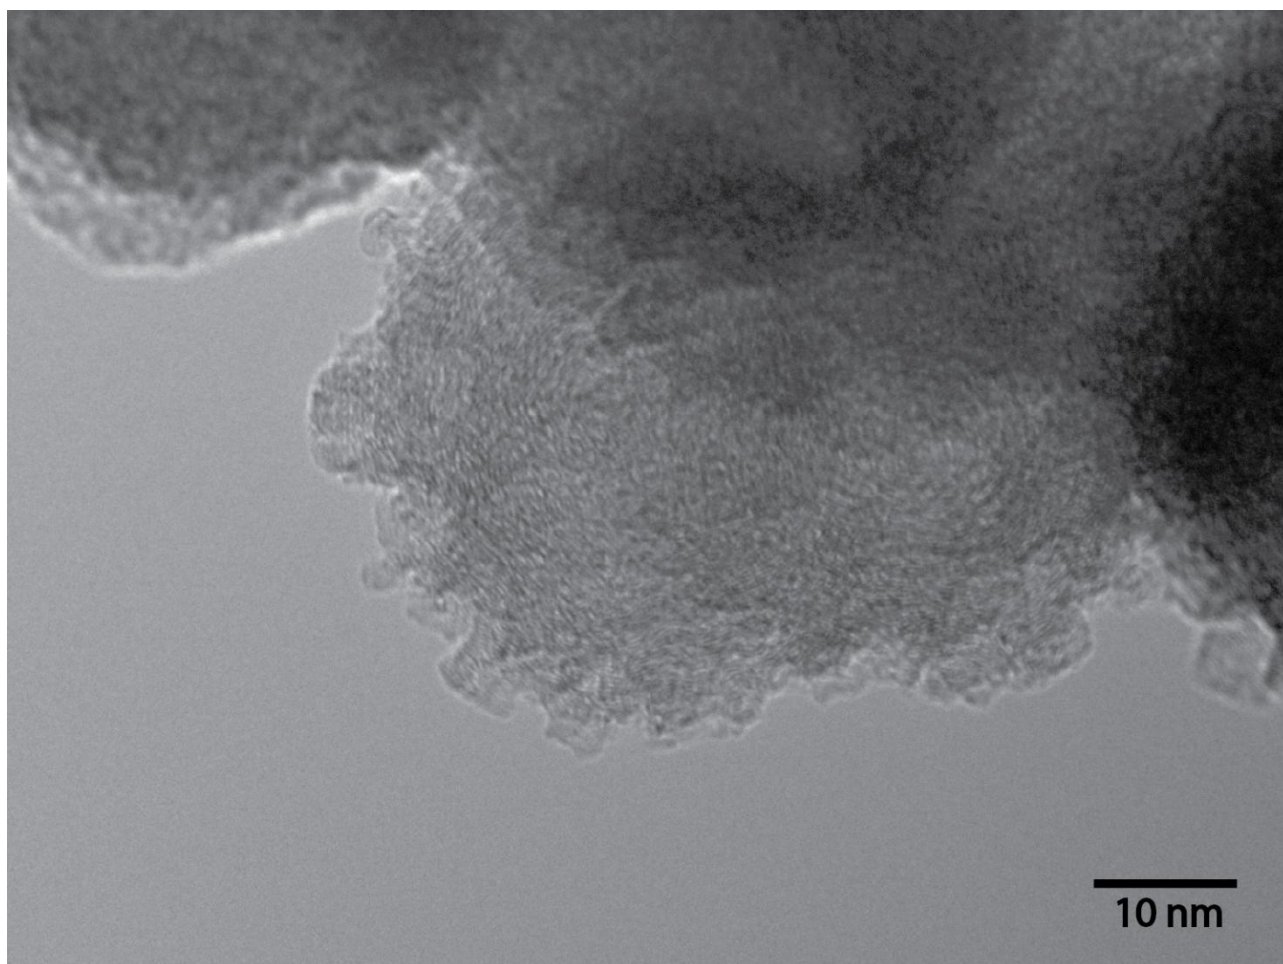

**Figure S42.** TEM image of a carbon flake formed on glass fiber surface during the reaction.

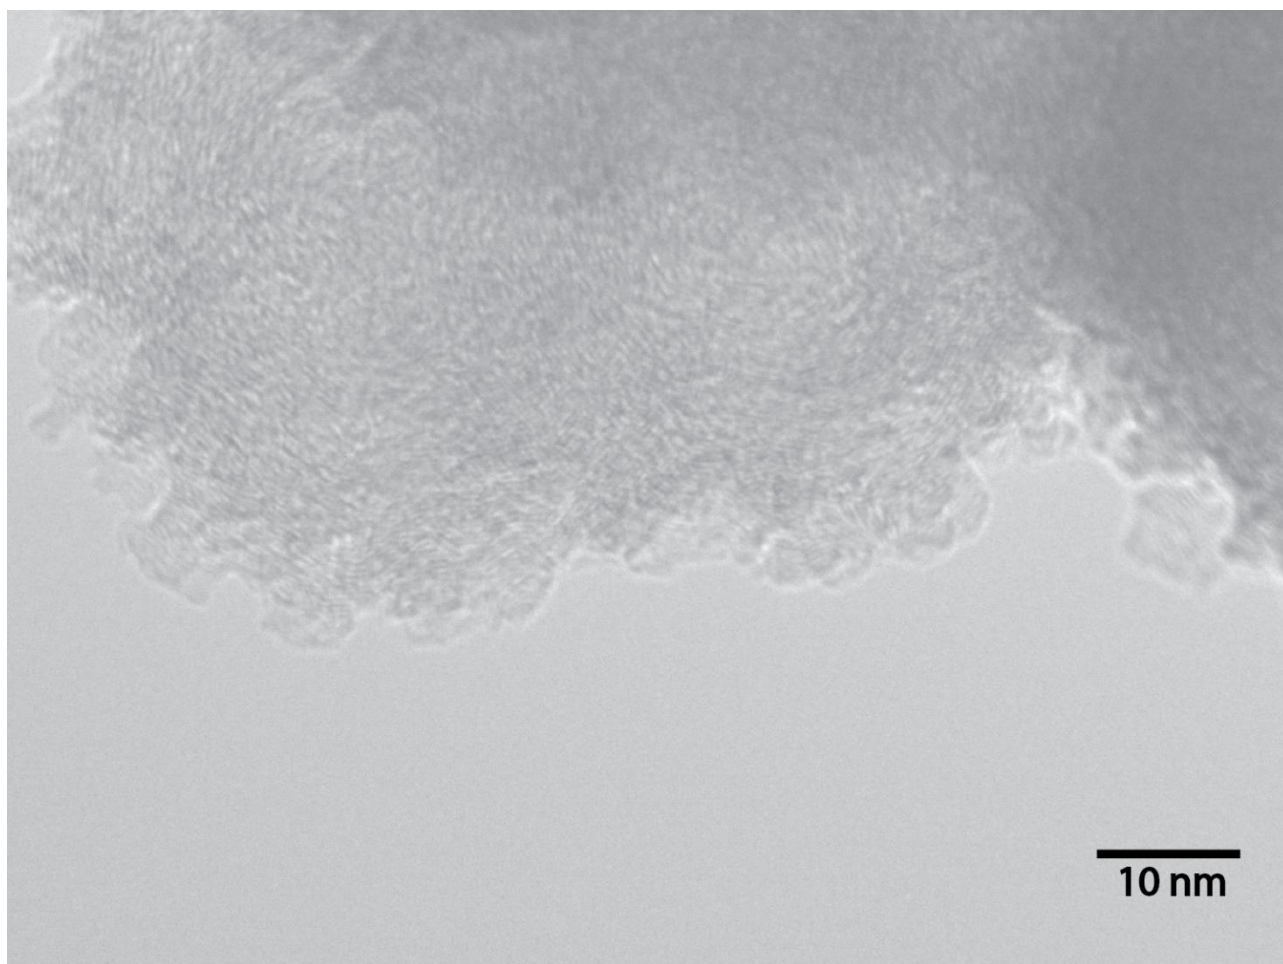

**Figure S43.** TEM image of a carbon flake formed on glass fiber surface during the reaction.

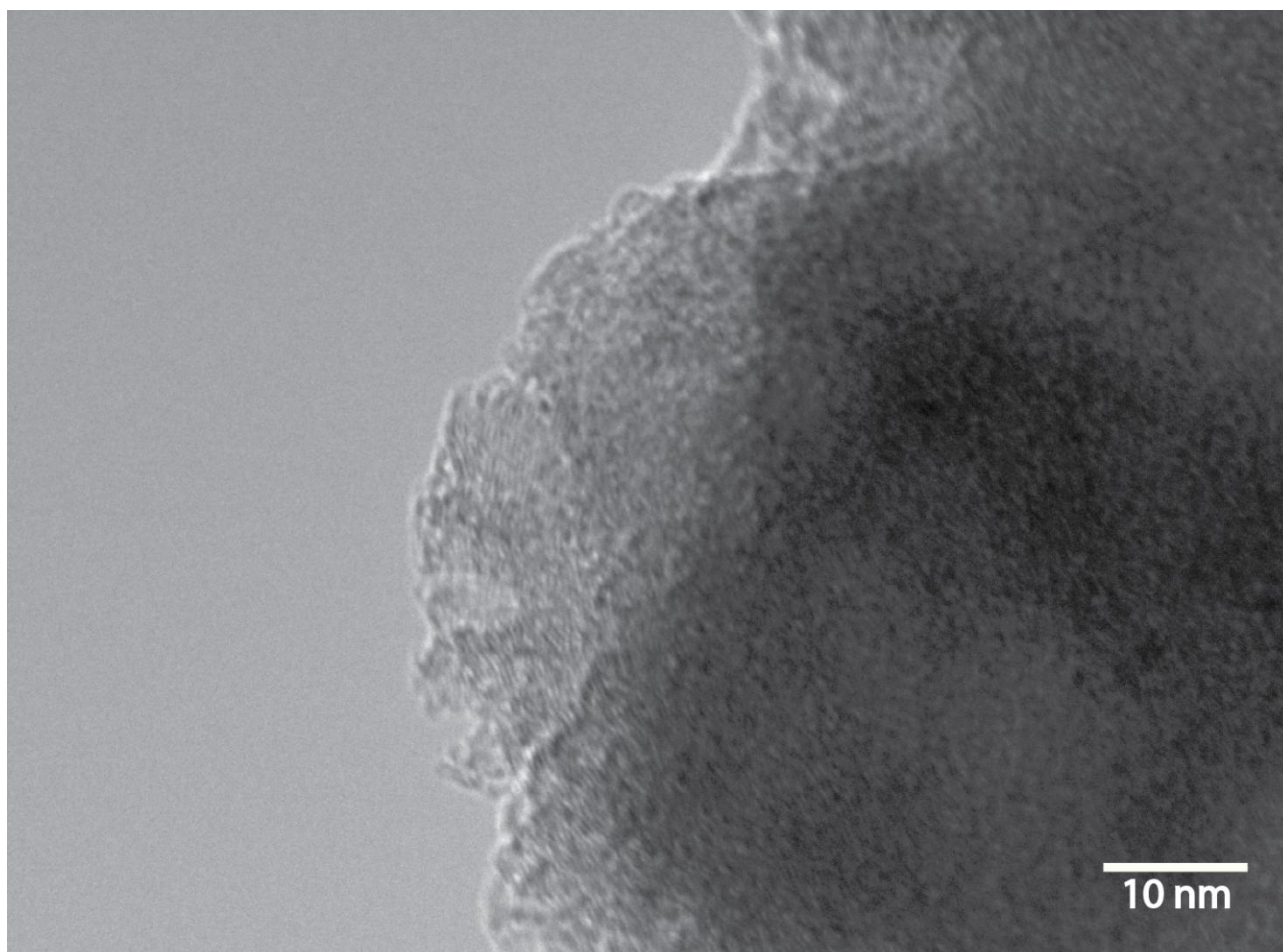

**Figure S44.** TEM image of a carbon flake formed on glass fiber surface during the reaction.

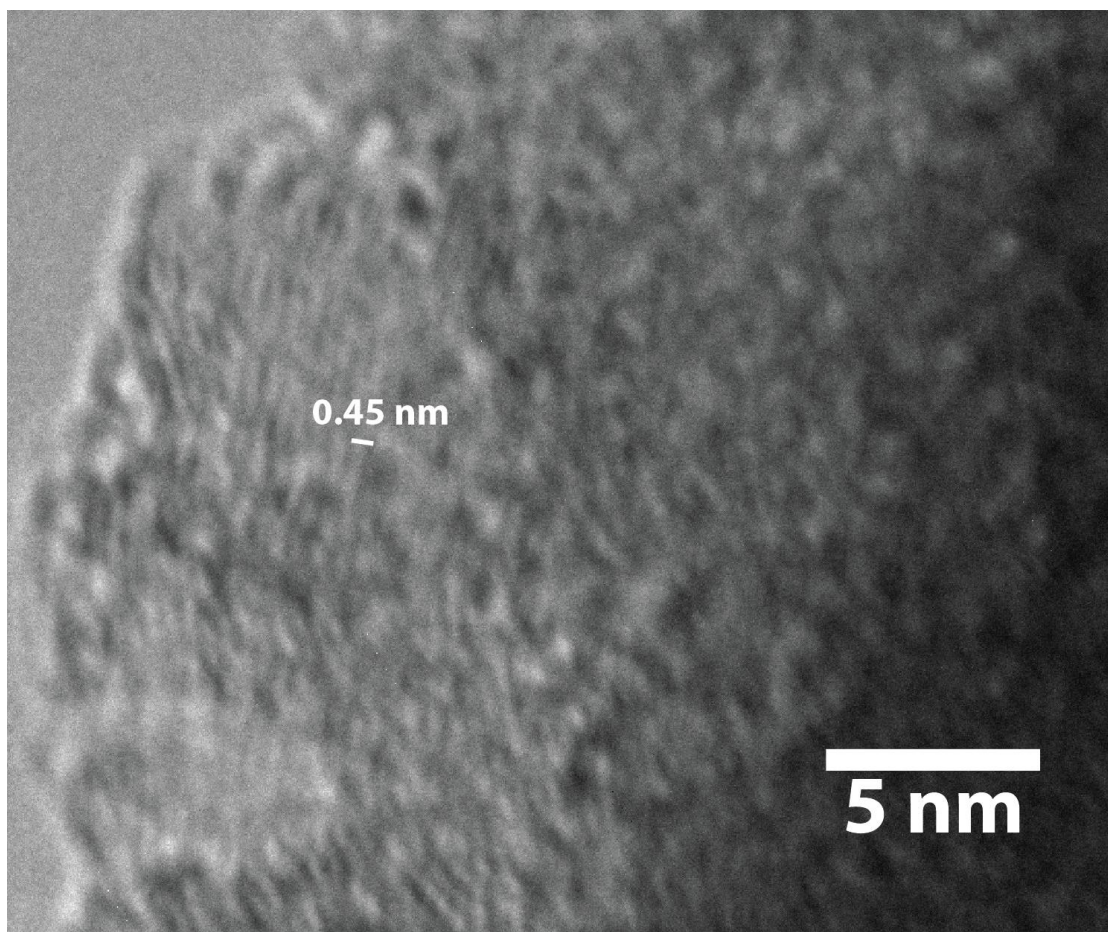

**Figure S45.** TEM image of a carbon flake formed on glass fiber surface during the reaction and an example of interlayer distance estimation.

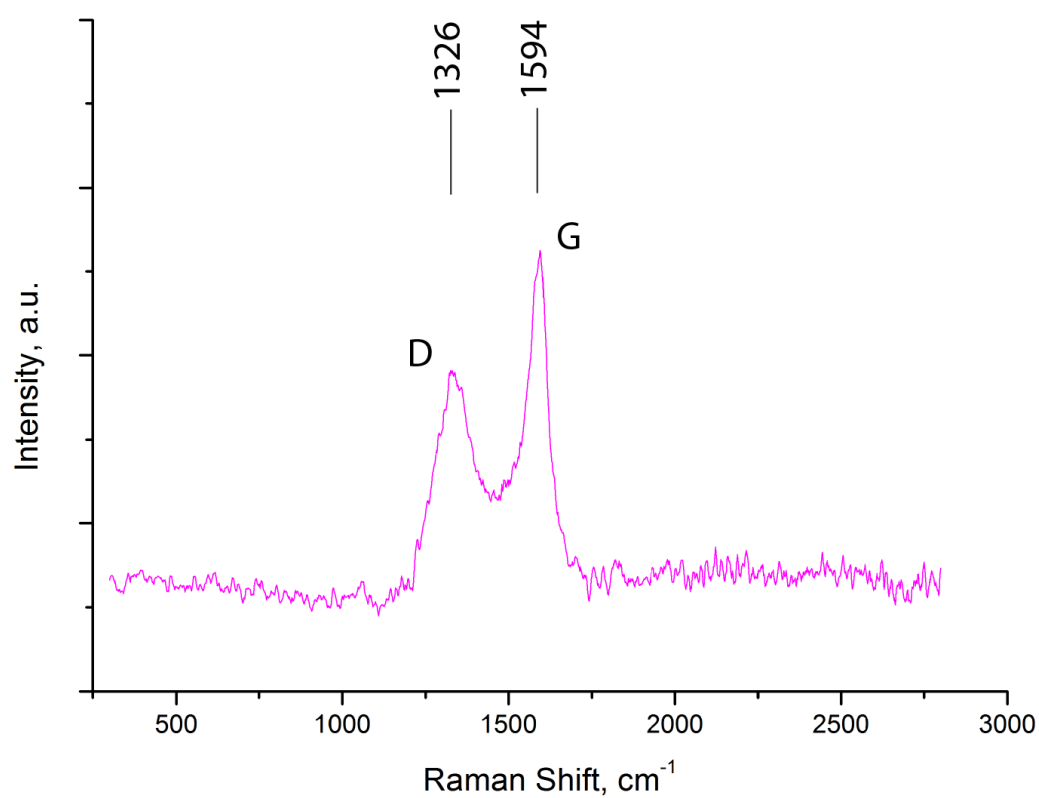

**Figure S46.** Raman spectrum of a carbon flake formed on glass fiber surface during the reaction; D and G modes at 1326 cm<sup>-1</sup> and 1594 cm<sup>-1</sup> are marked in the spectrum.
